# Supplementary material for: Solvent based selectivity in the synthesis of di(2-aryl-1H-3-indolyl) sulfides and 1-aryl-2-[(2-aryl-1H-3-indolyl)sulfanyl]-1-ethanones
Source: Royal Society of Chemistry journal article supplement (doi:10.1039/c1ra00878a), 2011-12-16

## Supporting Information

### Solvent based selectivity in the synthesis of di(2-aryl-1*H*-3-indolyl)sulfides and 1-aryl-2-[(2-aryl-1*H*-3-indolyl)sulfanyl]-1-ethanones

Selvam Chitra,<sup>a</sup> Nidhin Paul,<sup>b</sup> Shanmugam Muthusubramanian,<sup>b\*</sup> Paramasivam Manisankar,<sup>a\*</sup>

<sup>a</sup>*Department of Industrial Chemistry, Alagappa University, Karaikudi – 630 003, Tamil Nadu, India.*

<sup>b</sup>*Department of Organic Chemistry, School of Chemistry, Madurai Kamaraj University, Madurai – 625021, Tamil Nadu, India*

## Experimental

### 1.1 General Methods

All melting points reported in this work were measured in open capillaries. The <sup>1</sup>H and <sup>13</sup>C NMR spectra have been measured at 300 and 75 MHz respectively using Bruker 300 MHz (Avance) instrument in CDCl<sub>3</sub> using tetramethylsilane (TMS) as internal standard. Chemical shifts are reported as δ values (ppm). All one- and two-dimensional NMR spectra were obtained using standard Bruker software throughout. Elemental analyses were performed on a Perkin Elmer 2400 Series II Elemental CHNS analyzer. IR spectra were recorded on a JASCO FT IR instrument (KBr pellet).

| No. | List of Figures                                                                 | Page |
|-----|---------------------------------------------------------------------------------|------|
| 1   | <sup>1</sup> H NMR Spectrum <b>3b</b> (recorded in Acetone d <sub>6</sub> )     | 4    |
| 2   | <sup>1</sup> H NMR Spectrum <b>3b</b> (expanded)                                | 4    |
| 3   | <sup>13</sup> C NMR Spectrum of <b>3b</b> (recorded in Acetone d <sub>6</sub> ) | 5    |
| 4   | DEPT-135 Spectrum of <b>3b</b>                                                  | 5    |
| 5   | H,H-COSY Spectrum of <b>3b</b>                                                  | 6    |
| 6   | H,H-COSY Spectrum of <b>3b</b> (expanded)                                       | 6    |
| 7   | HMBC Spectrum of <b>3b</b>                                                      | 7    |
| 8   | HMBC Spectrum of <b>3b</b> (expanded)                                           | 7    |
| 9   | C,H-COSY Spectrum of <b>3b</b>                                                  | 8    |
| 10  | C,H-COSY Spectrum of <b>3b</b> (expanded)                                       | 8    |
| 11  | <sup>1</sup> H NMR Spectrum <b>4d</b> (recorded in Acetone d <sub>6</sub> )     | 9    |
| 12  | <sup>1</sup> H NMR Spectrum <b>4d</b> (expanded)                                | 9    |
| 13  | <sup>13</sup> C NMR Spectrum of <b>4d</b> (recorded in Acetone d <sub>6</sub> ) | 10   |
| 14  | DEPT-135 Spectrum of <b>4d</b>                                                  | 10   |
| 15  | H,H-COSY Spectrum of <b>4d</b>                                                  | 11   |
| 16  | H,H-COSY Spectrum of <b>4d</b> (expanded)                                       | 11   |
| 17  | HMBC Spectrum of <b>4d</b>                                                      | 12   |
| 18  | HMBC Spectrum of <b>4d</b> (expanded)                                           | 12   |
| 19  | C,H-COSY Spectrum of <b>4d</b>                                                  | 13   |
| 20  | C,H-COSY Spectrum of <b>4d</b> (expanded)                                       | 13   |
| 21  | <sup>1</sup> H NMR Spectrum of <b>7d</b> (CDCl <sub>3</sub> )                   | 14   |
| 22  | <sup>1</sup> H NMR Spectrum of <b>7d</b> (expanded)                             | 14   |
| 23  | <sup>13</sup> C NMR Spectrum of <b>7d</b> (CDCl <sub>3</sub> )                  | 15   |
| 24  | <sup>13</sup> C NMR Spectrum of <b>7d</b> (expanded)                            | 15   |
| 25  | DEPT-135 Spectrum of <b>7d</b>                                                  | 16   |
| 26  | <sup>1</sup> H NMR Spectrum of <b>6d</b> (CDCl <sub>3</sub> )                   | 16   |

|    |                                                                |    |
|----|----------------------------------------------------------------|----|
| 27 | <sup>1</sup> H NMR Spectrum of <b>6d</b> (expanded)            | 17 |
| 28 | <sup>13</sup> C NMR Spectrum of <b>6d</b> (CDCl <sub>3</sub> ) | 17 |
| 28 | <sup>13</sup> C NMR Spectrum of <b>6d</b> (expanded)           | 18 |
| 30 | DEPT-135 Spectrum of <b>6d</b>                                 | 18 |
| 31 | Mass spectrum of <b>4a</b>                                     | 19 |
| 32 | Mass spectrum of <b>4b</b>                                     | 19 |
| 33 | Mass spectrum of <b>5b</b>                                     | 20 |
| 34 | Mass spectrum of <b>5d</b>                                     | 20 |
| 35 | Mass spectrum of <b>5e</b>                                     | 21 |
| 36 | Mass spectrum of <b>7a</b>                                     | 21 |
| 37 | Mass spectrum of <b>6b</b>                                     | 22 |
| 38 | Mass spectrum of <b>6c</b>                                     | 22 |

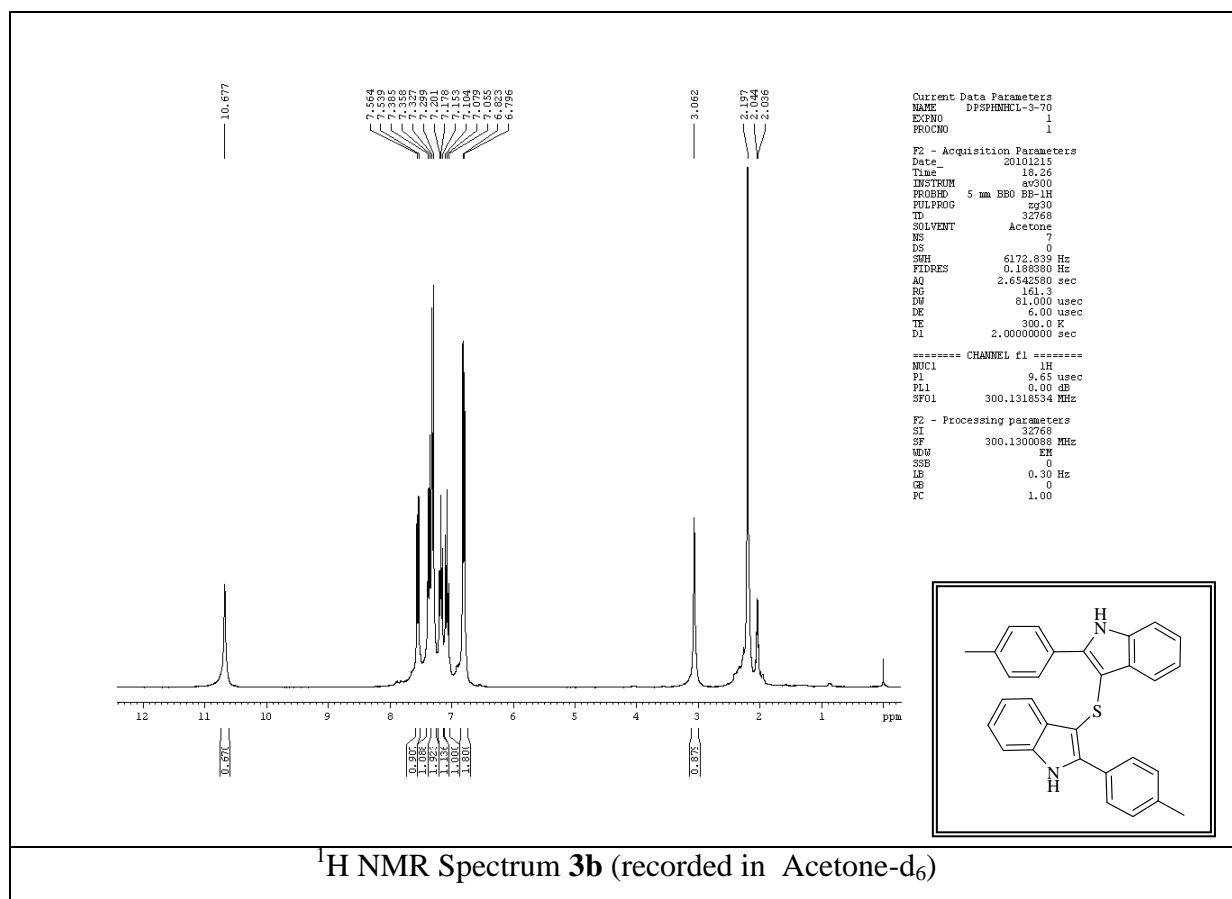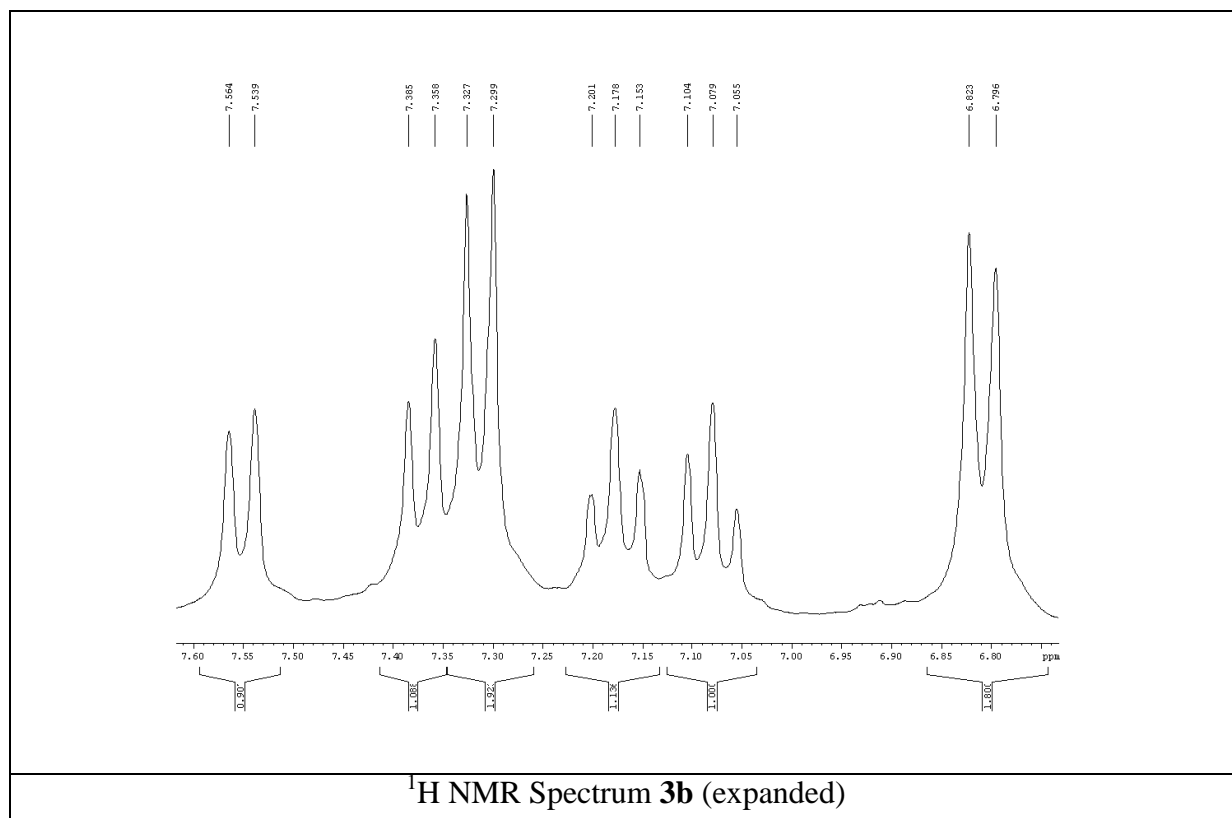

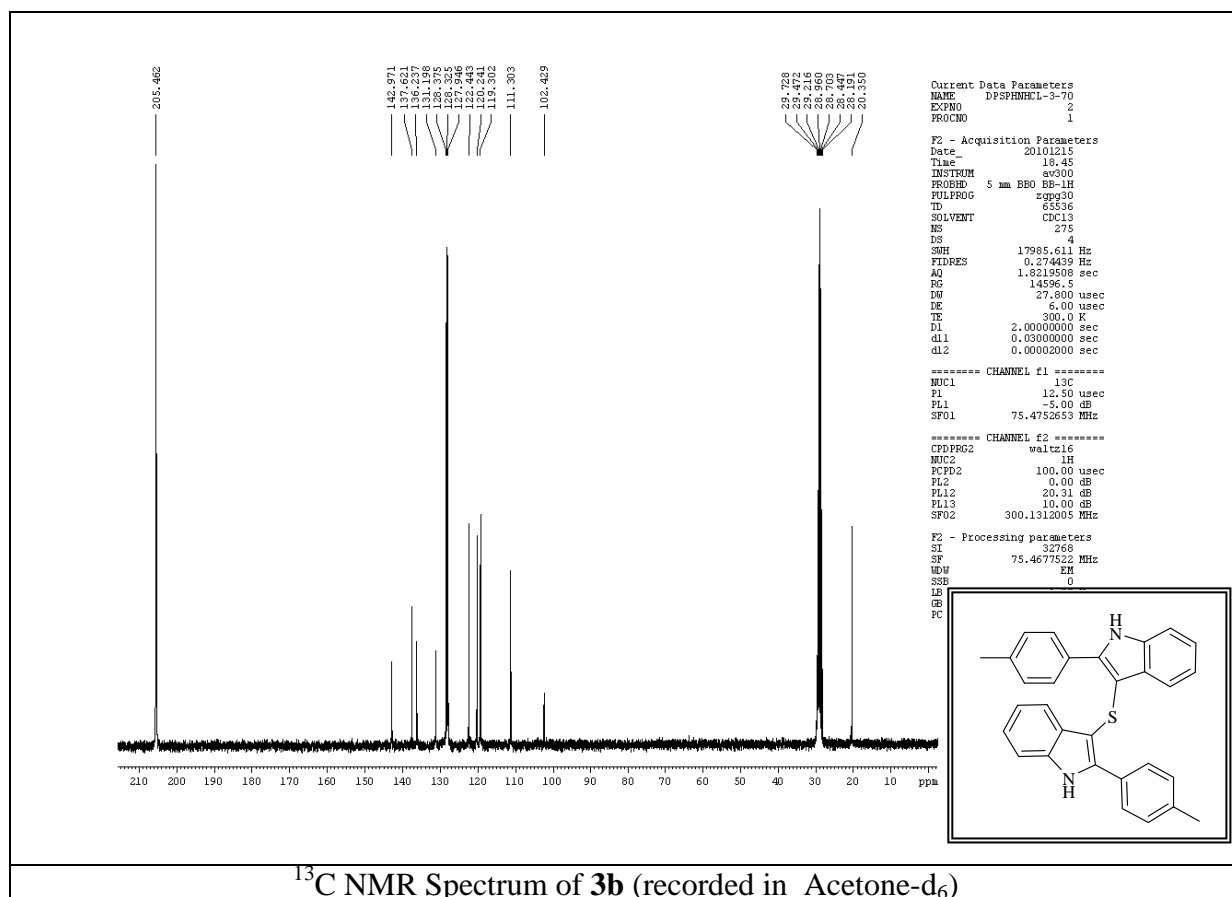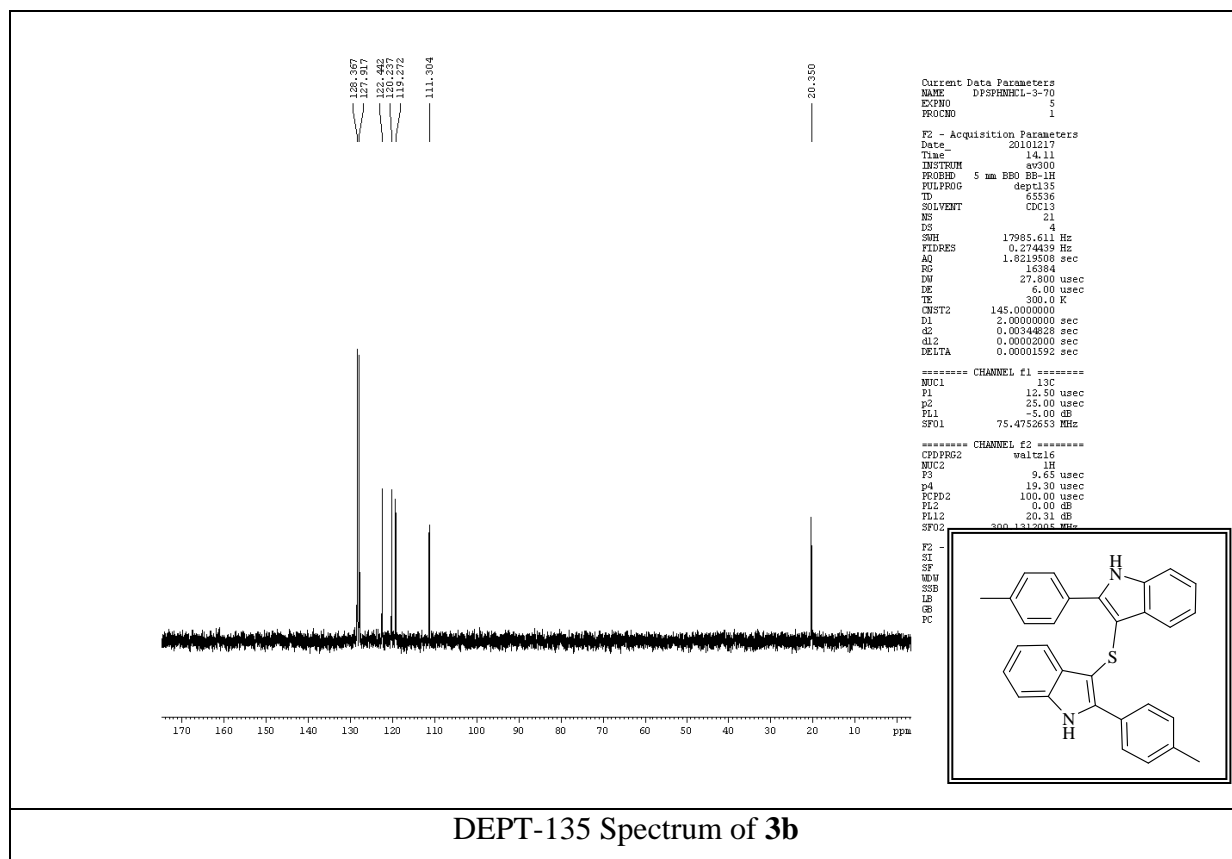

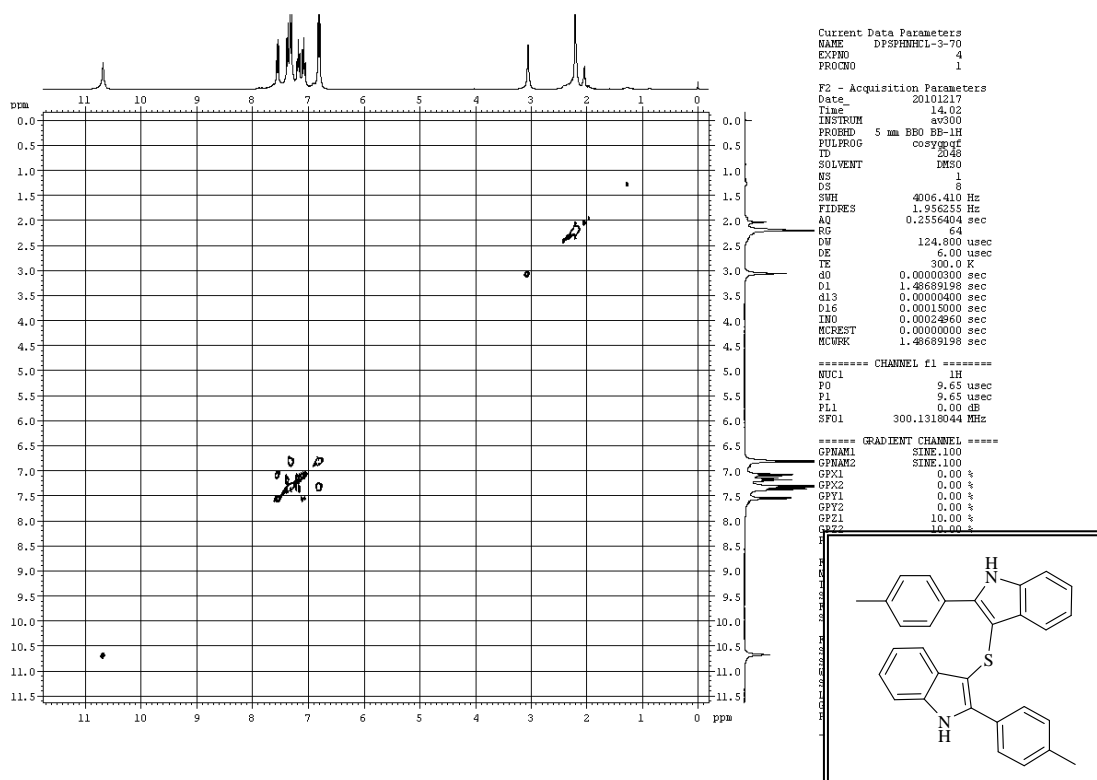

H,H-COSY Spectrum of **3b**

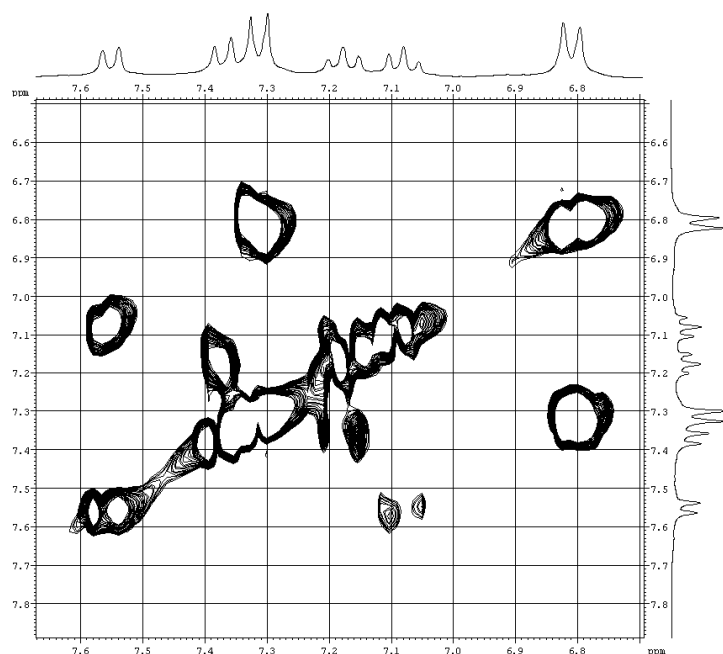

H,H-COSY Spectrum of **3b** (expanded)

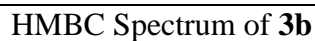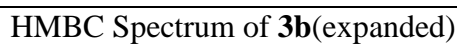

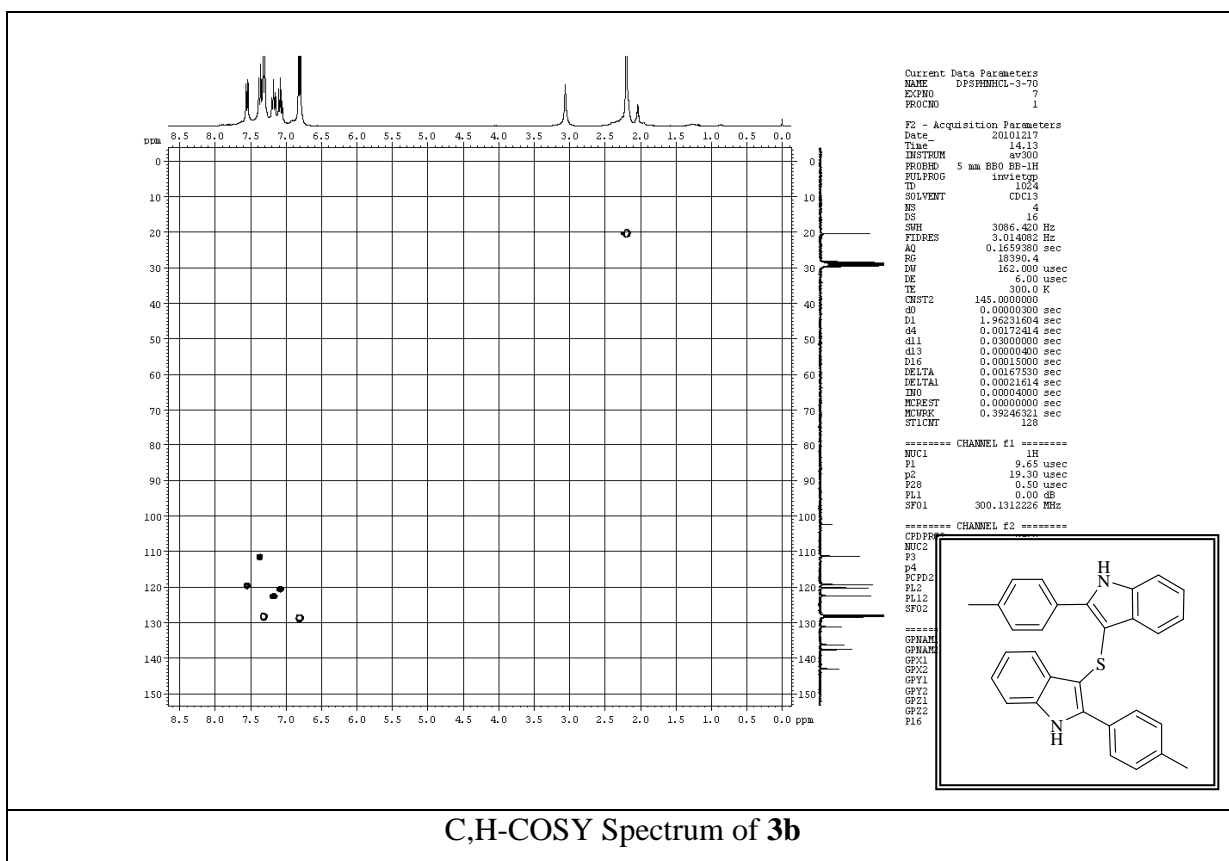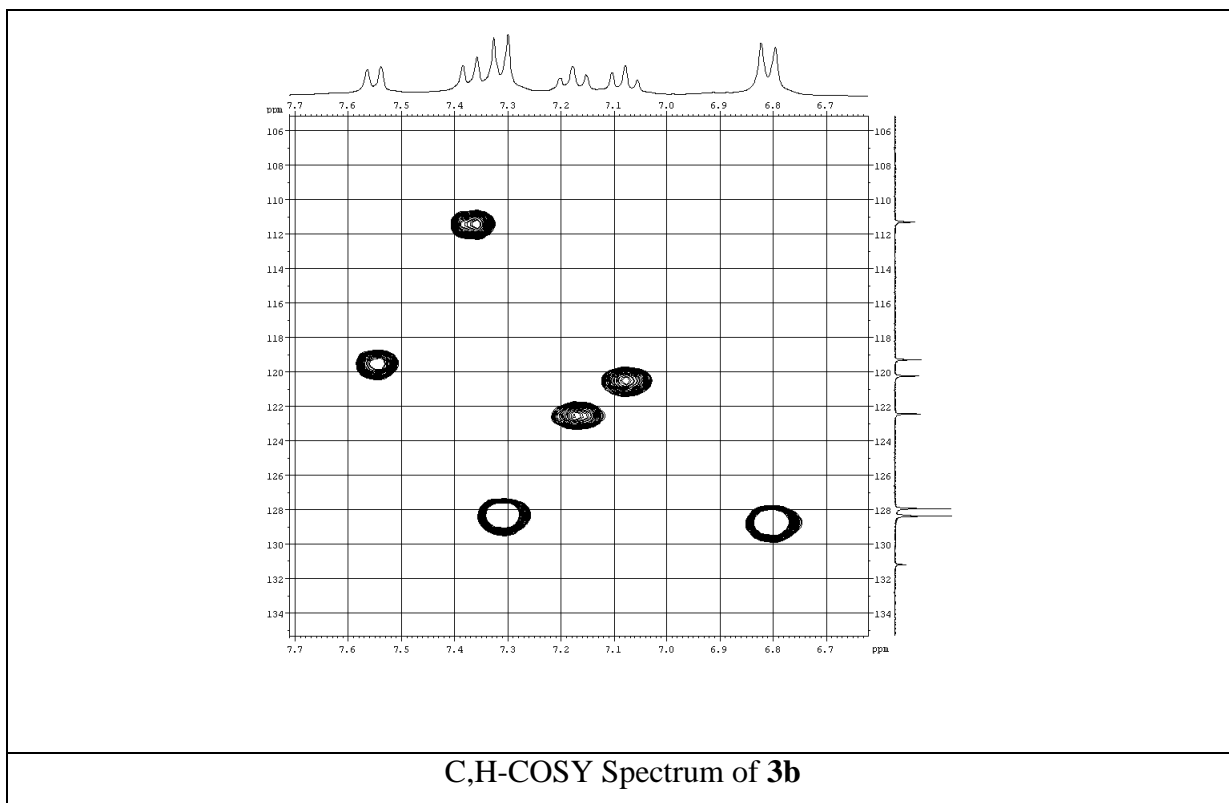



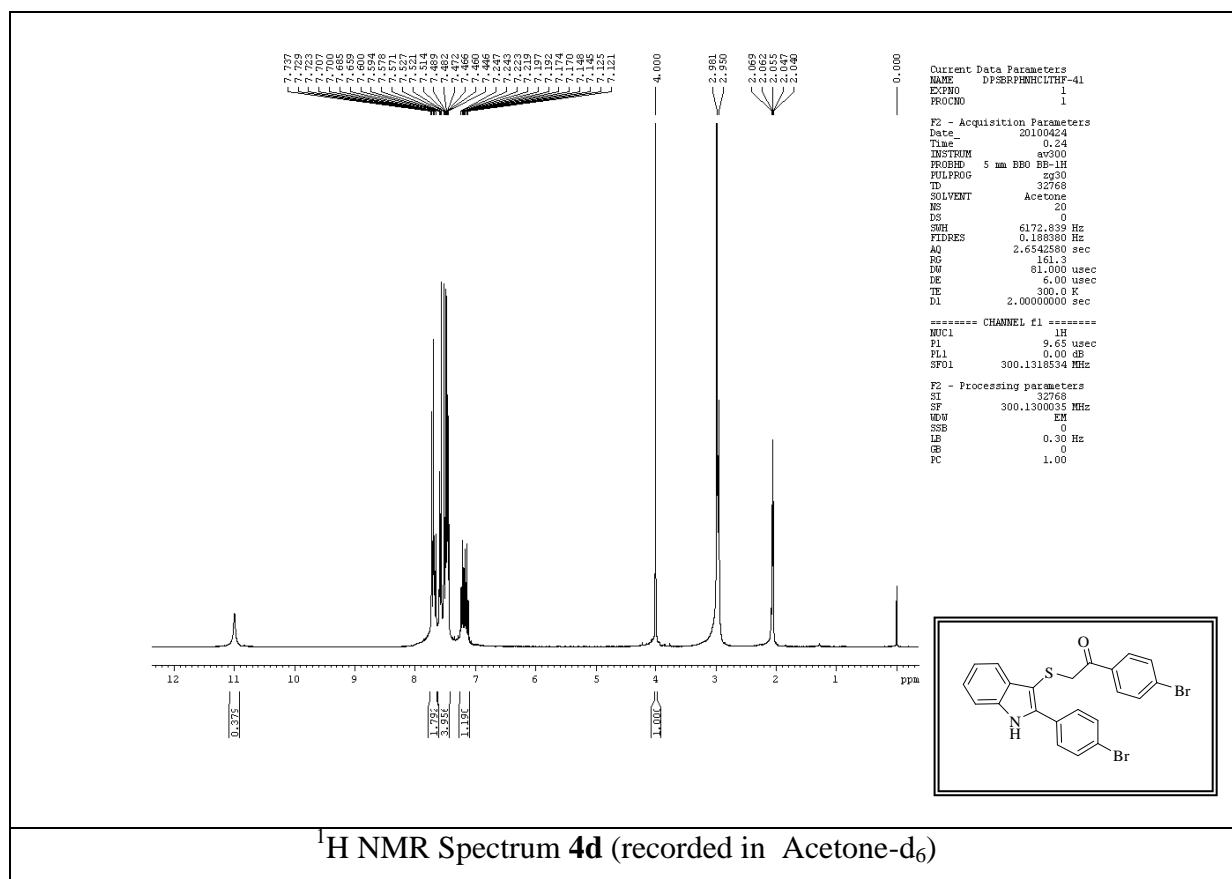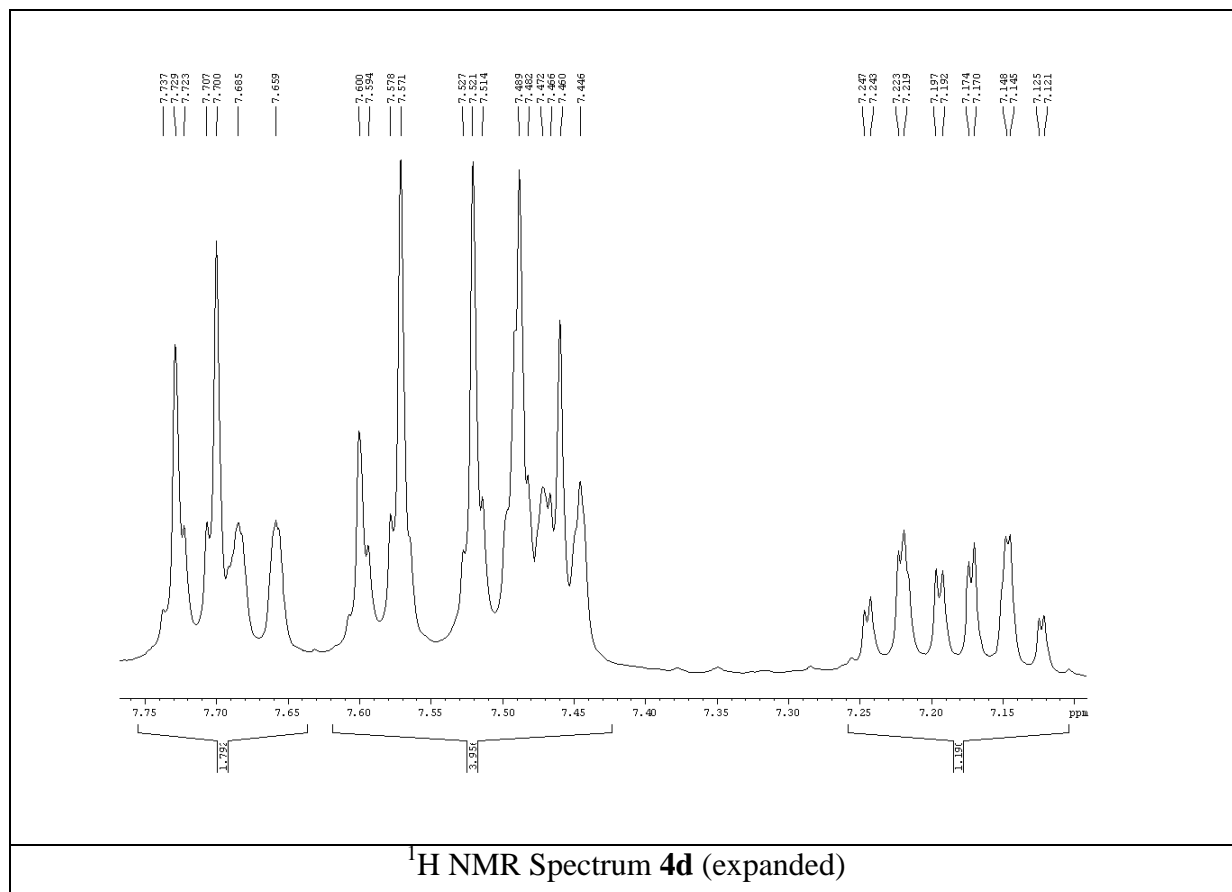

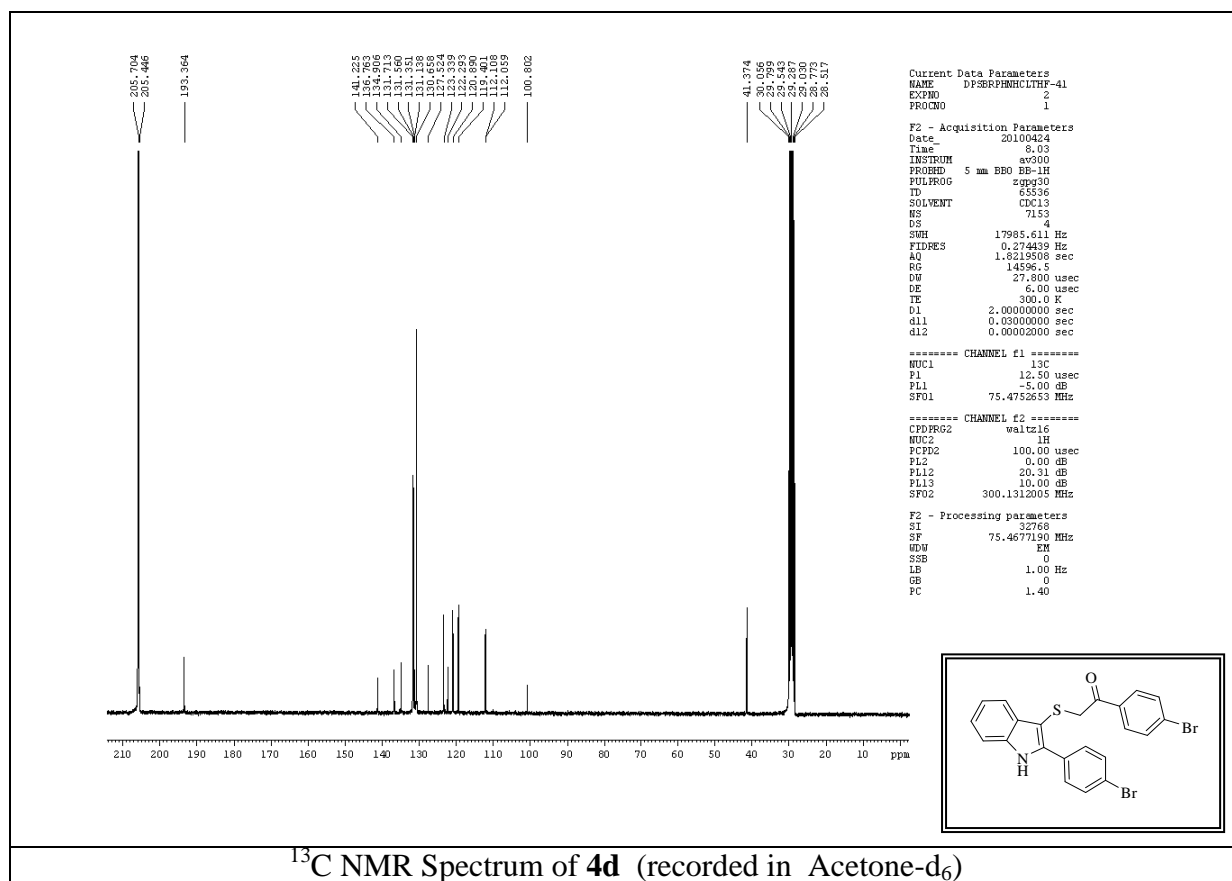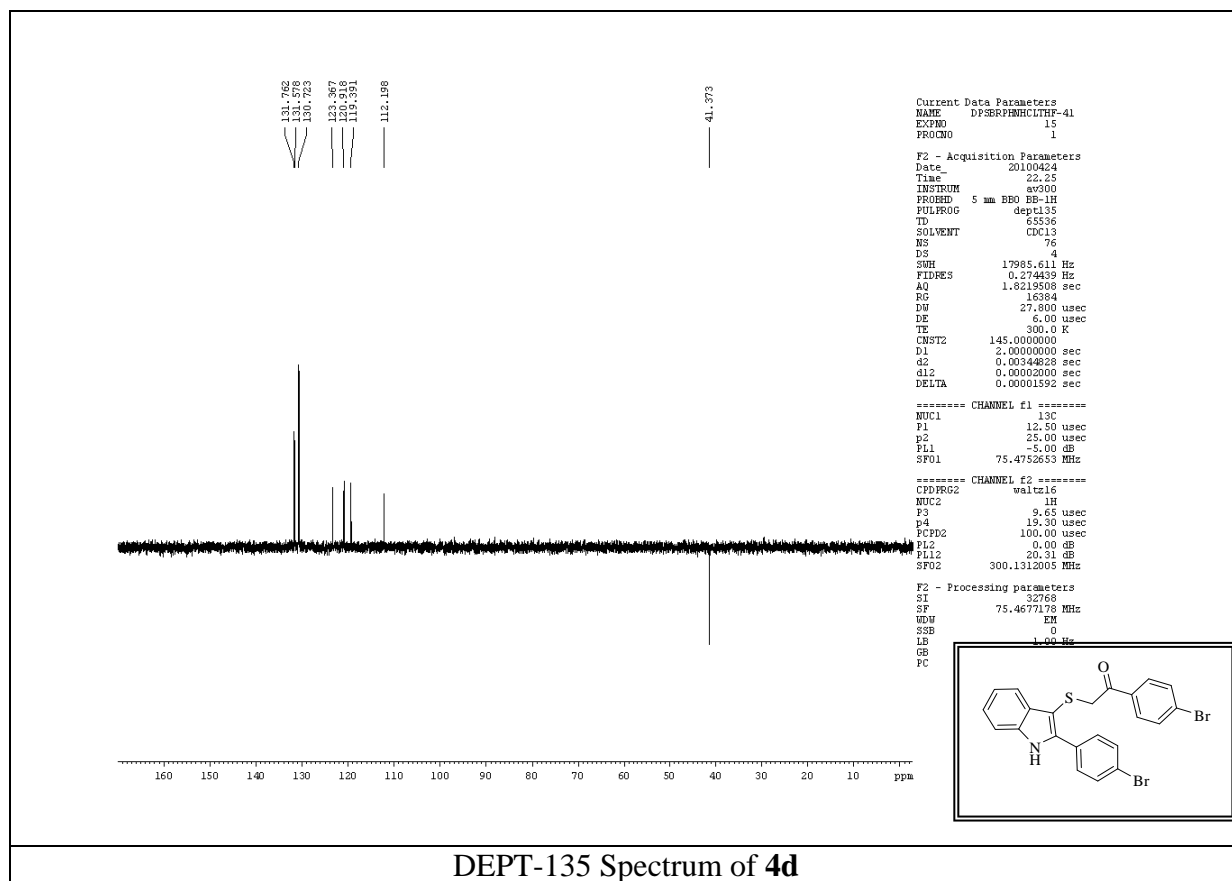

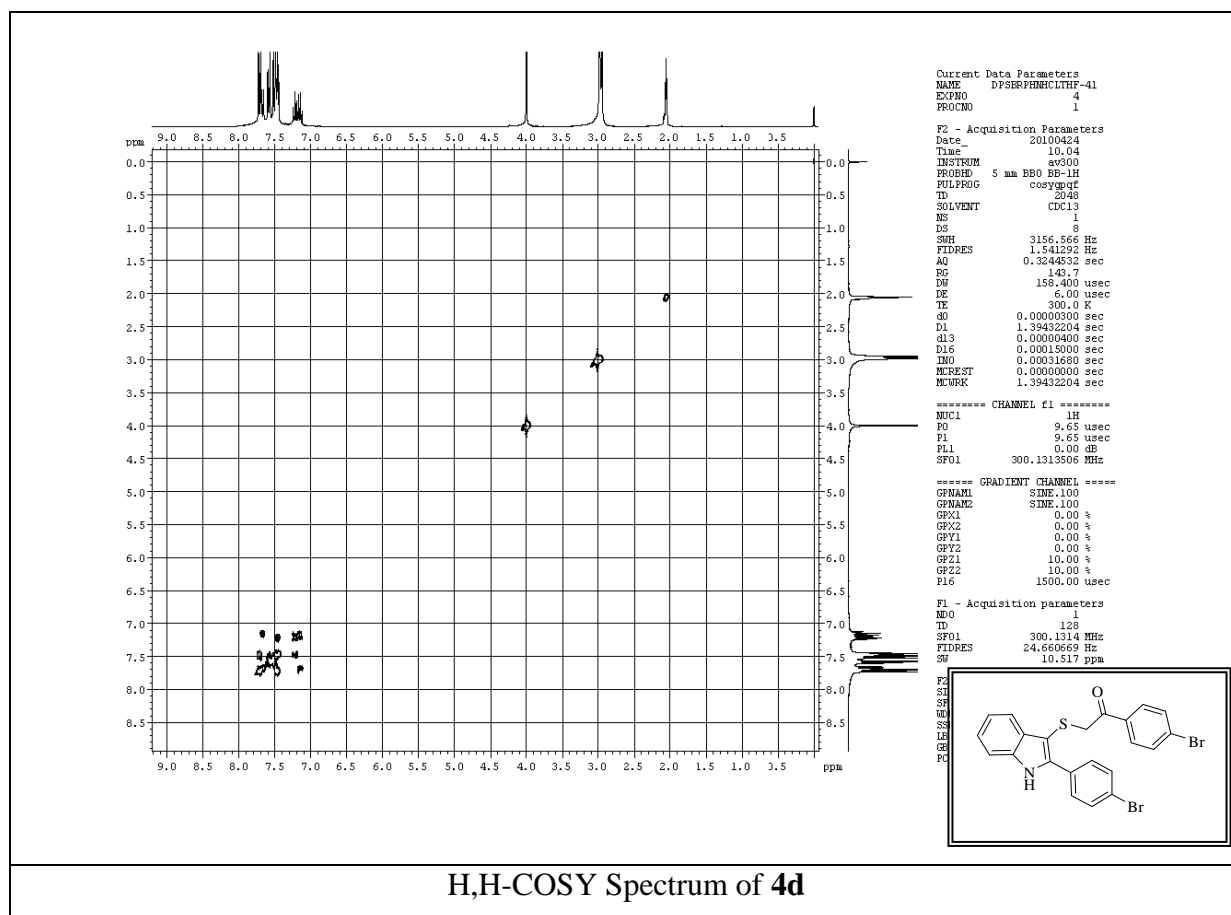

H,H-COSY Spectrum of **4d**

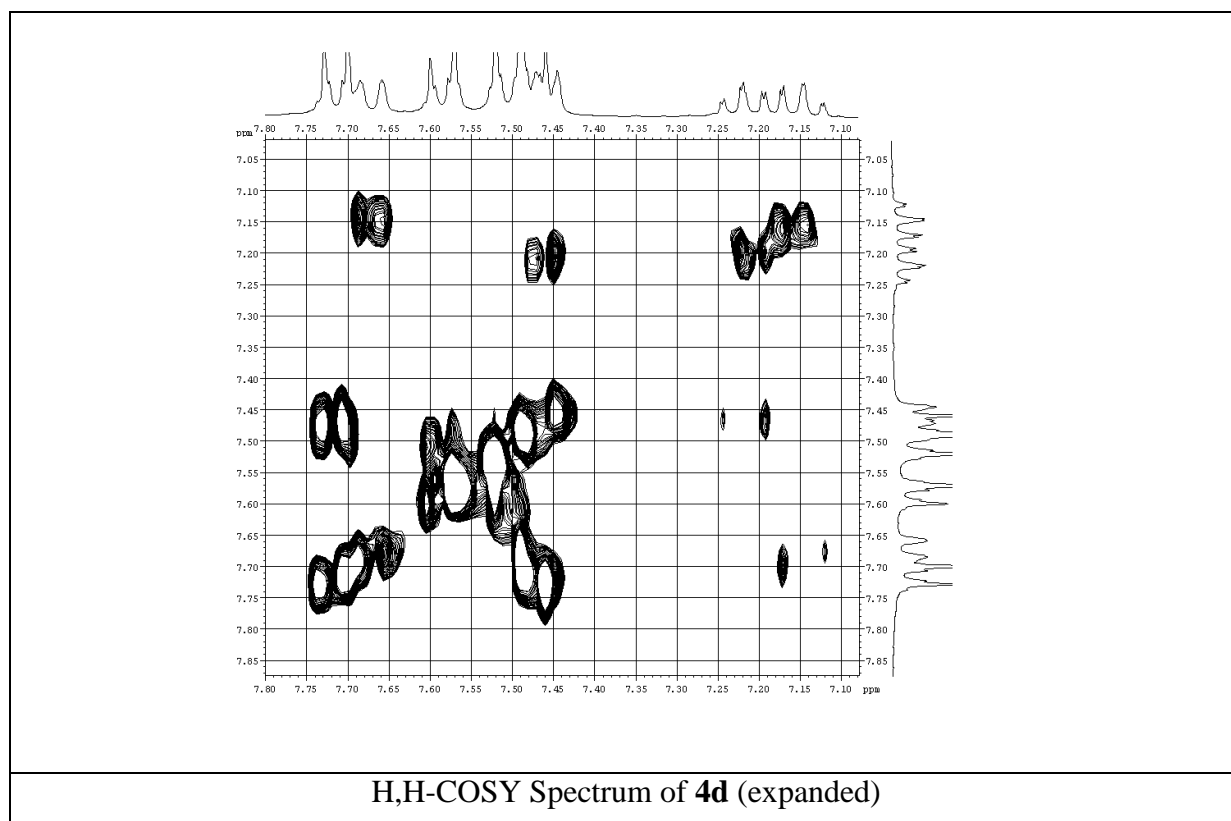

H,H-COSY Spectrum of **4d** (expanded)

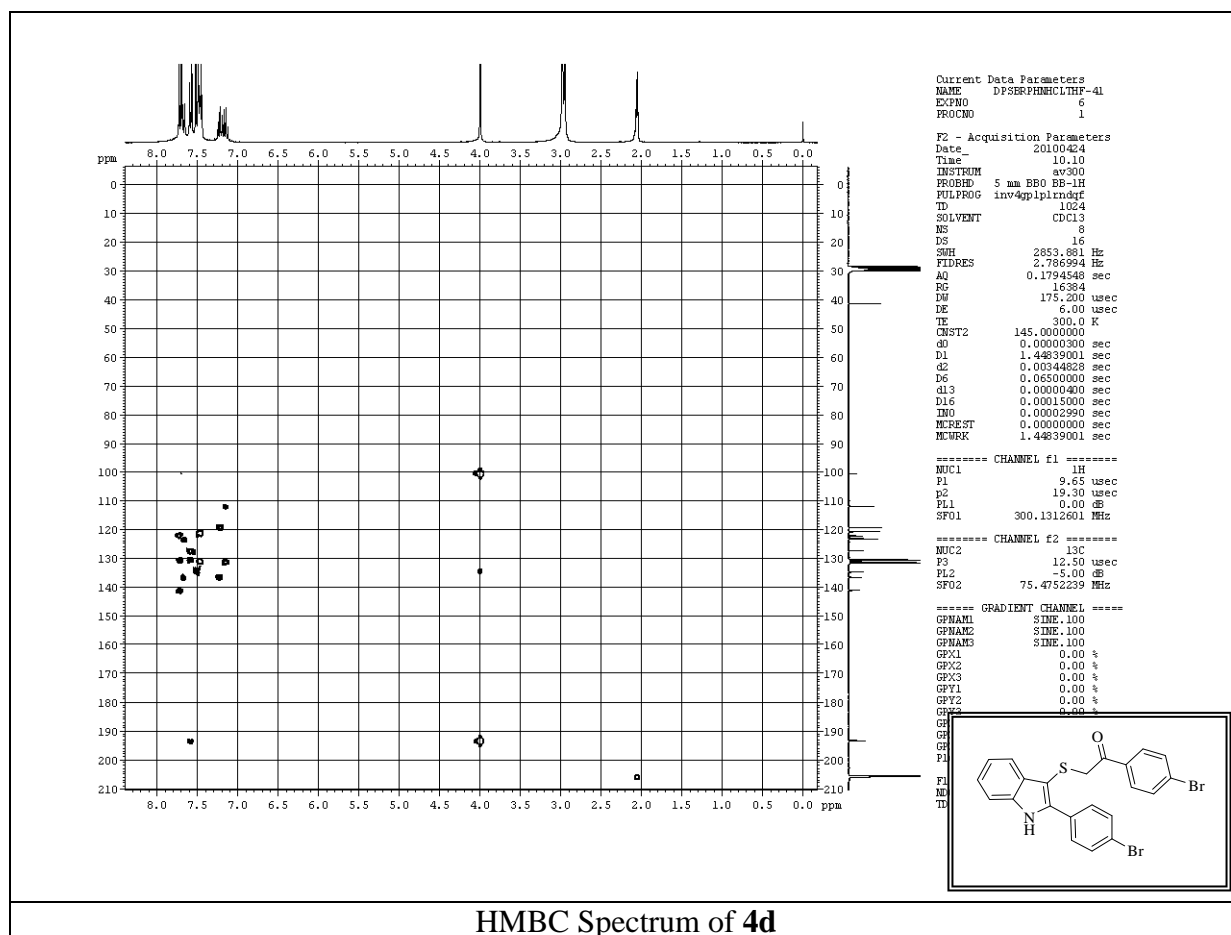

HMBC Spectrum of **4d**

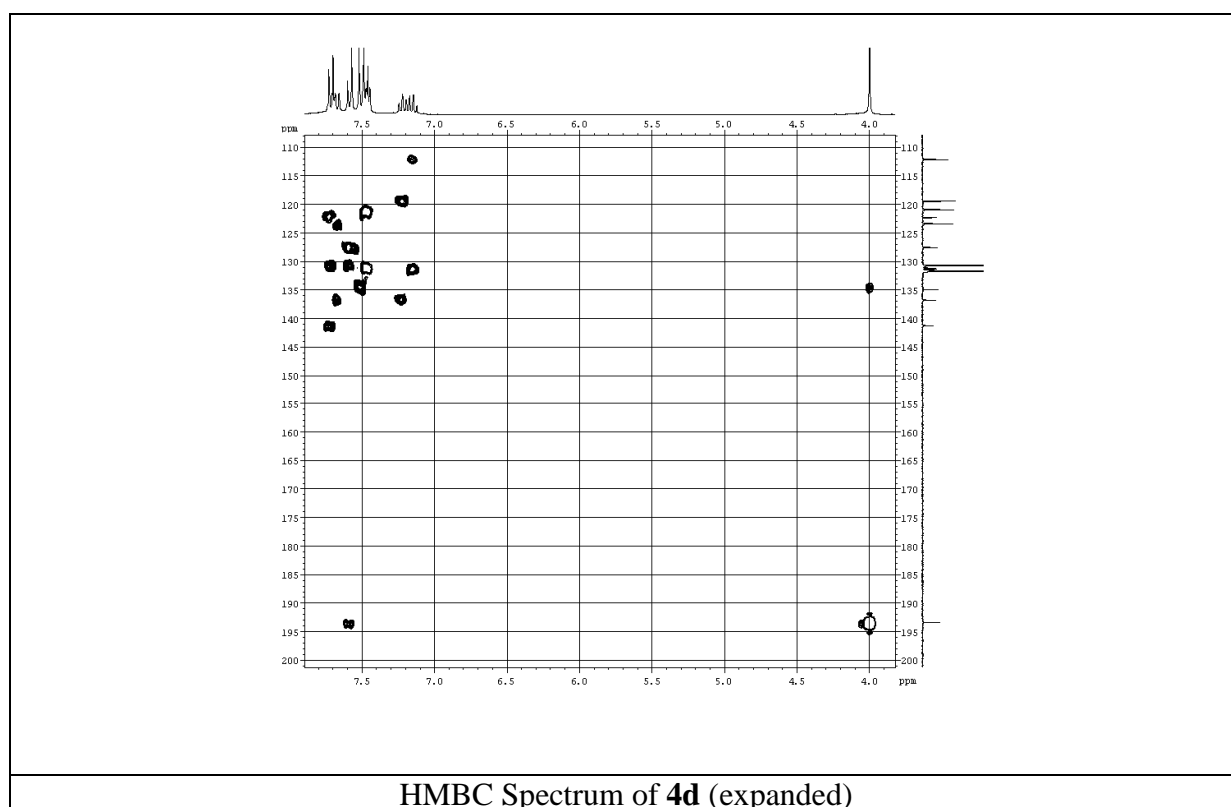

HMBC Spectrum of **4d** (expanded)

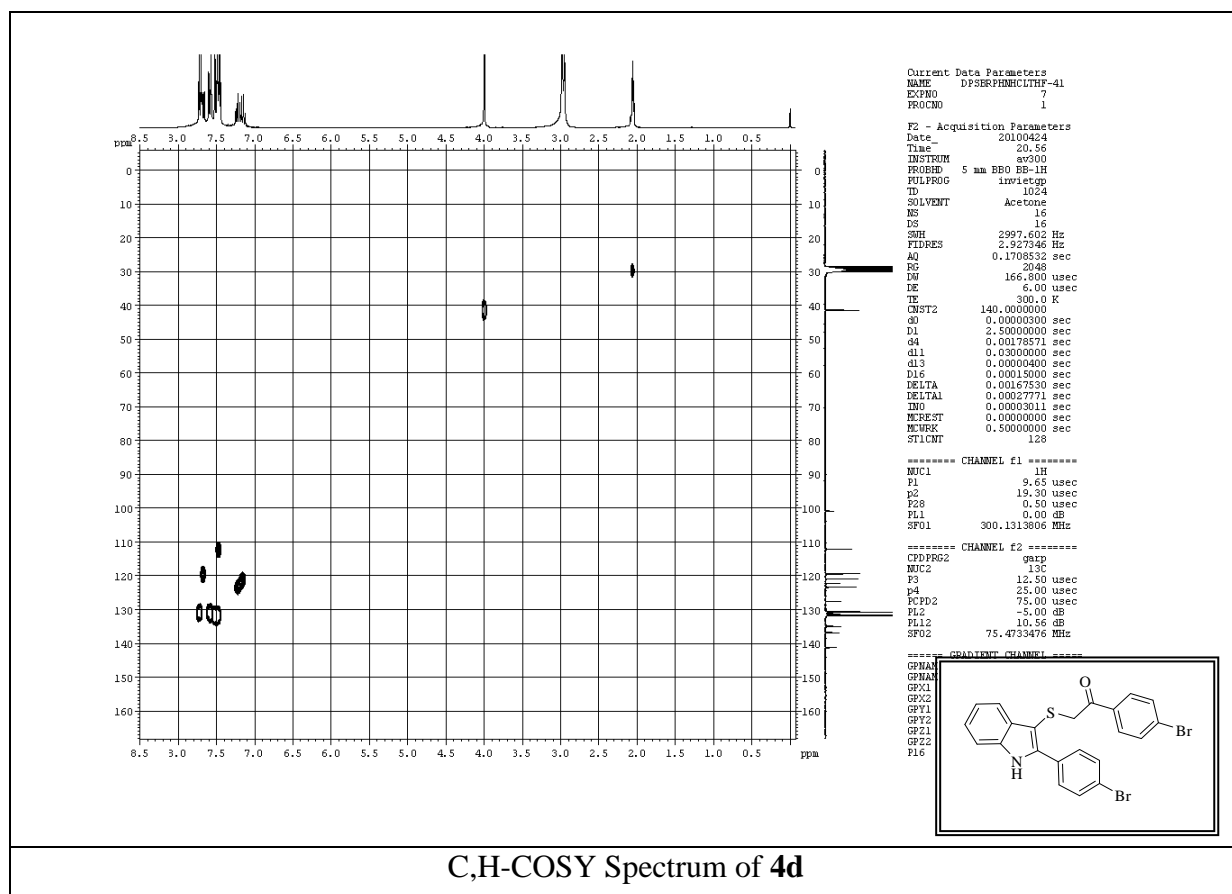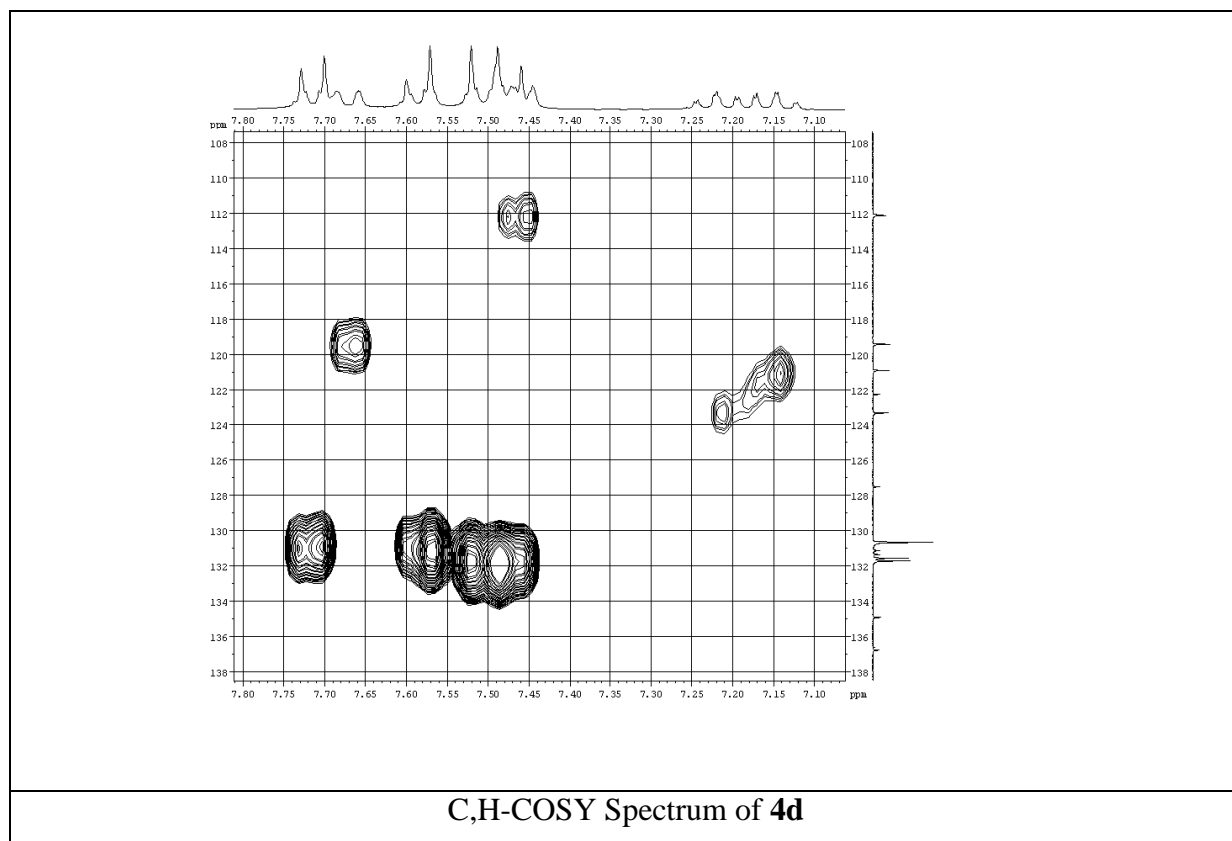

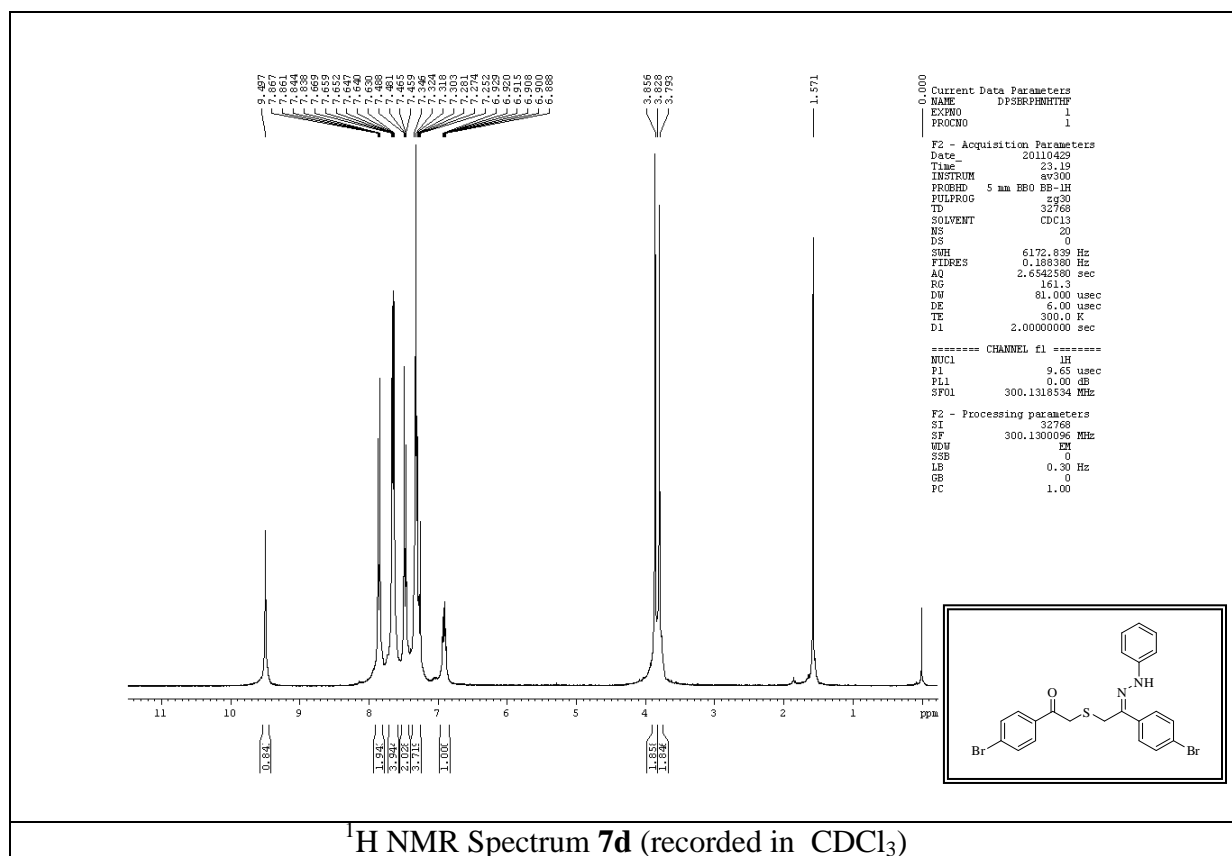

<sup>1</sup>H NMR Spectrum **7d** (recorded in CDCl<sub>3</sub>)

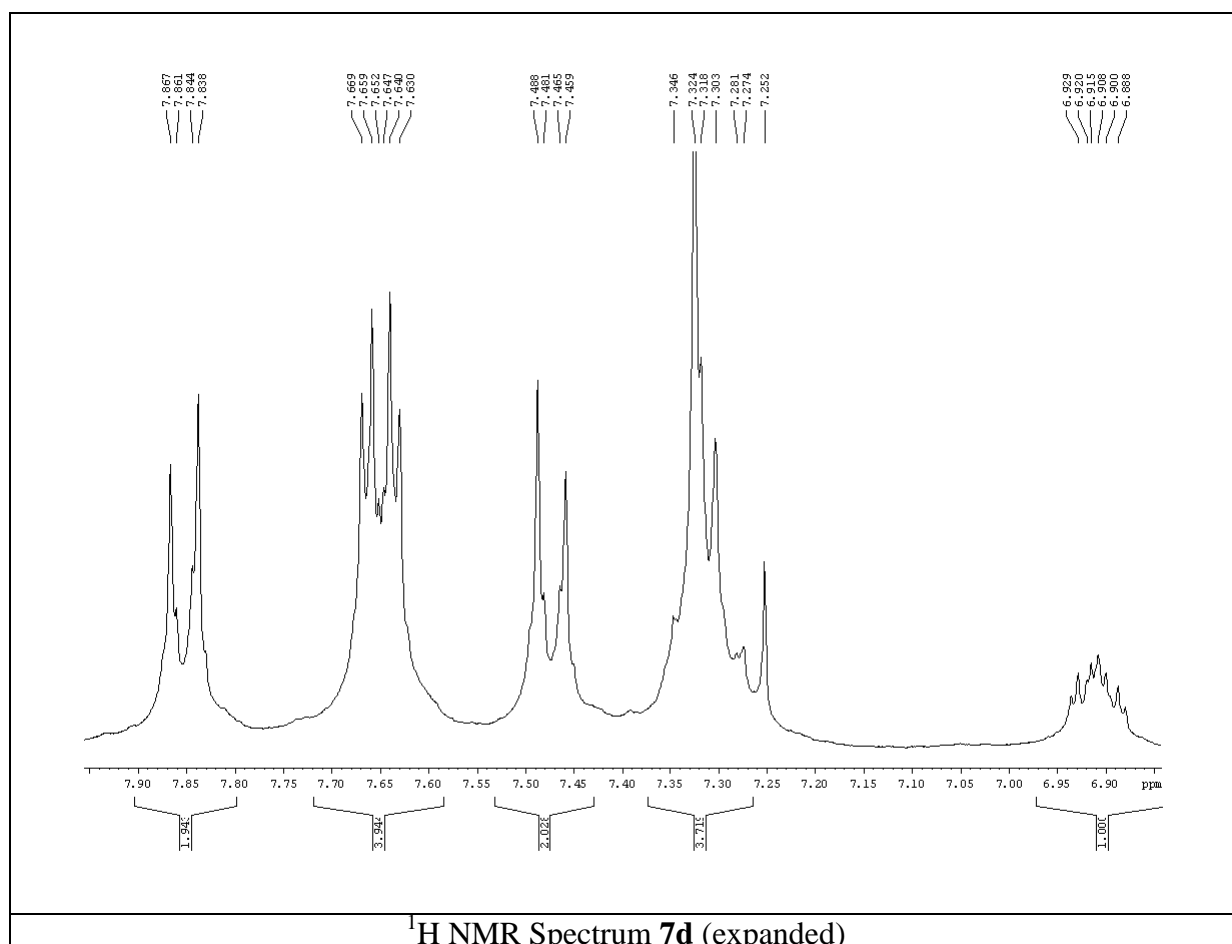

<sup>1</sup>H NMR Spectrum **7d** (expanded)

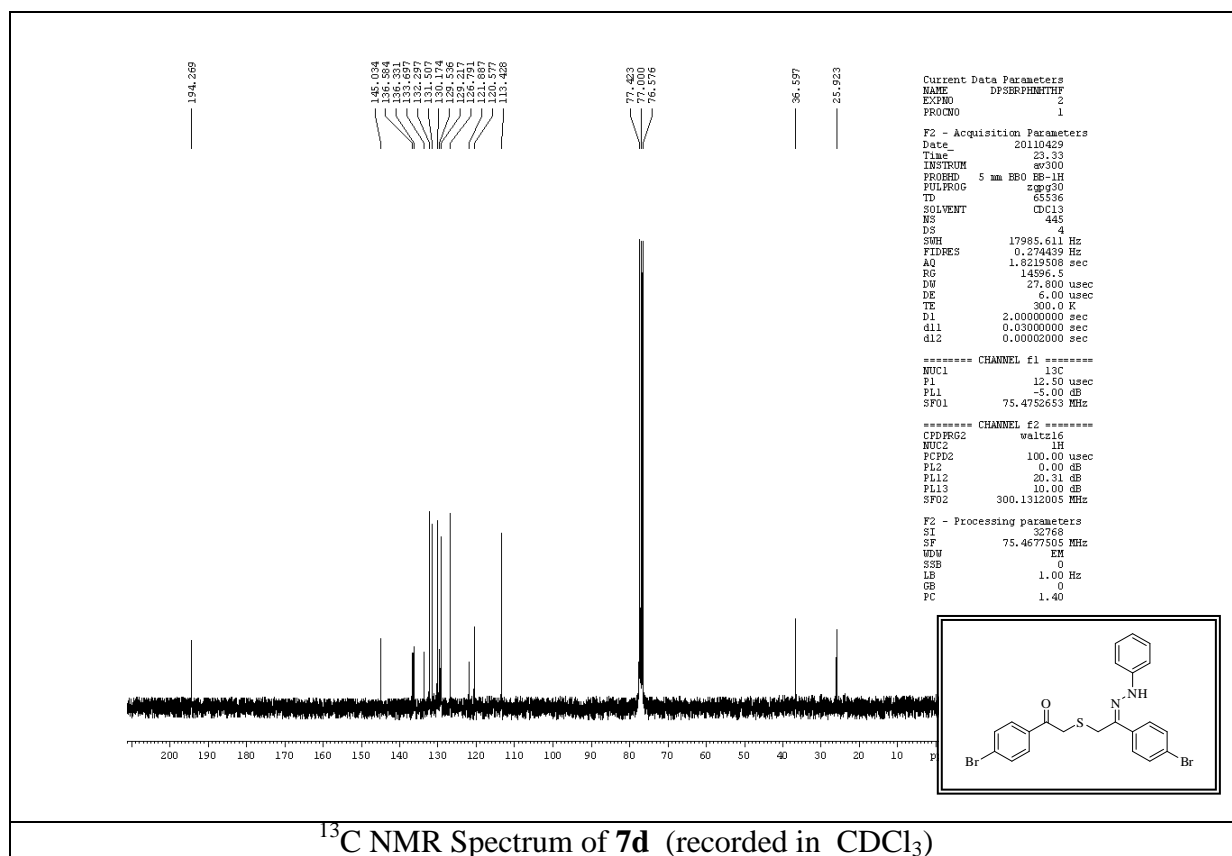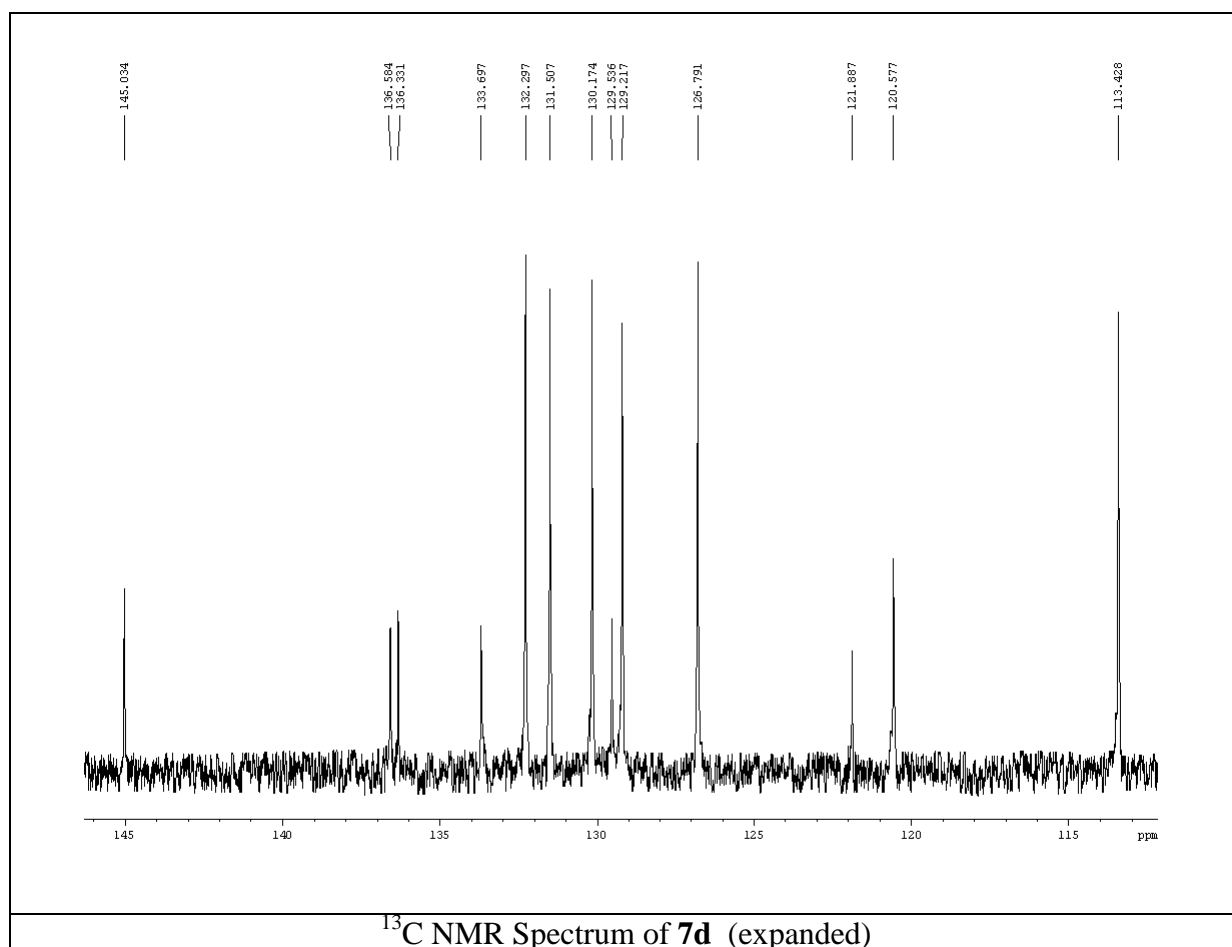

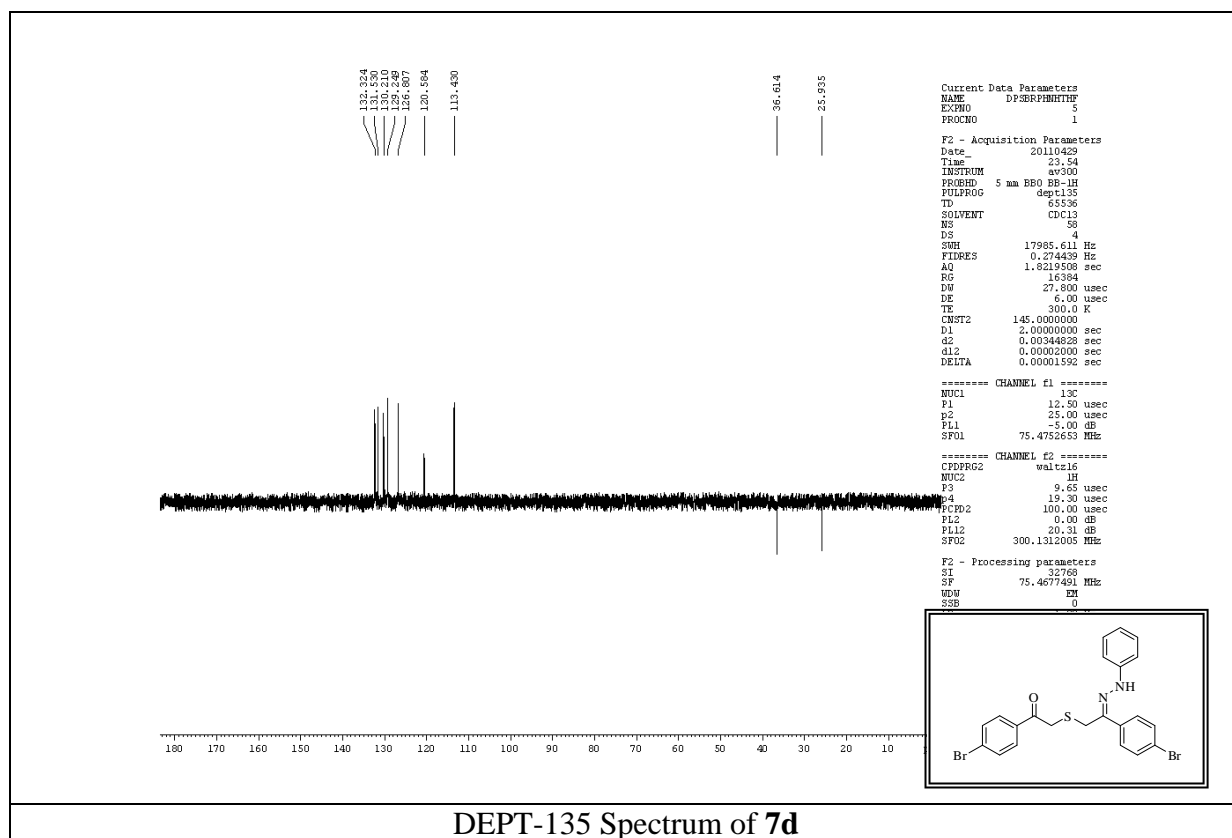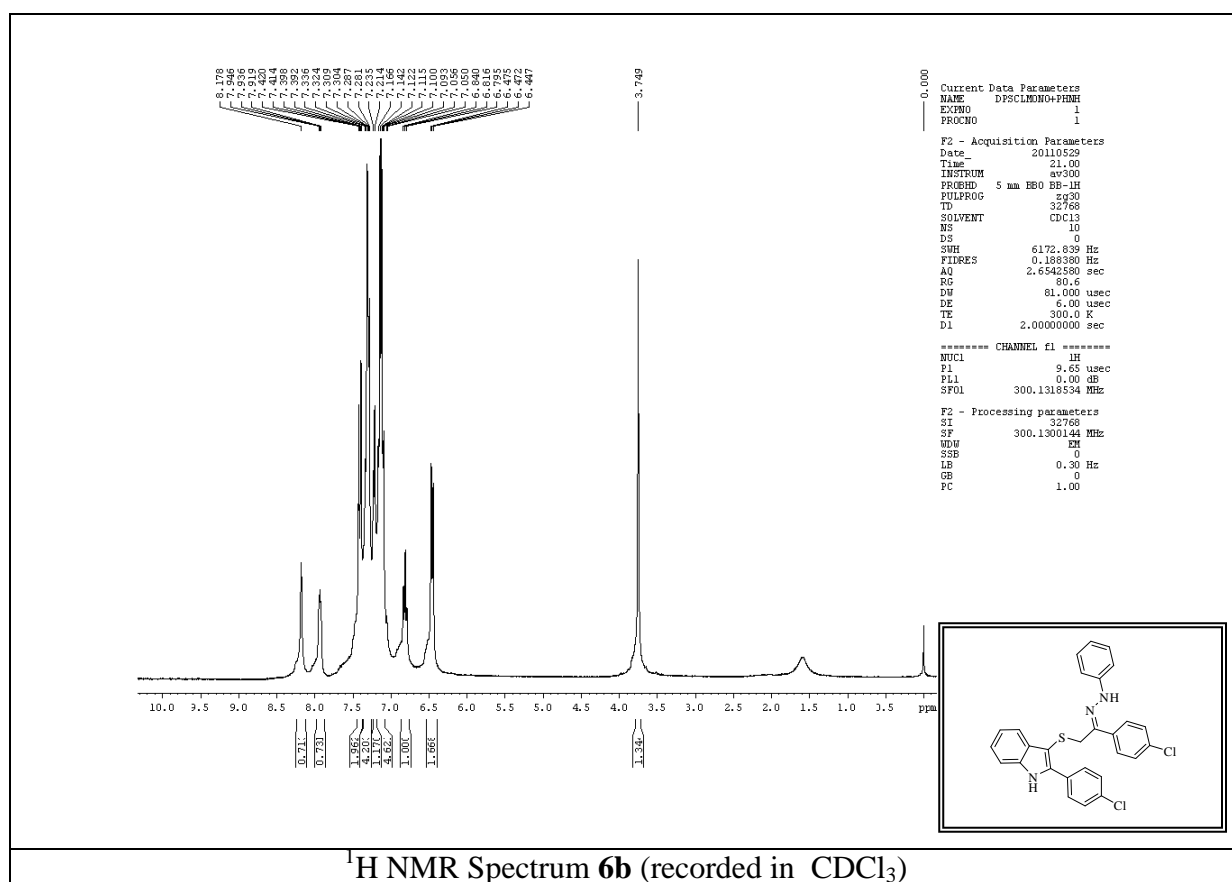



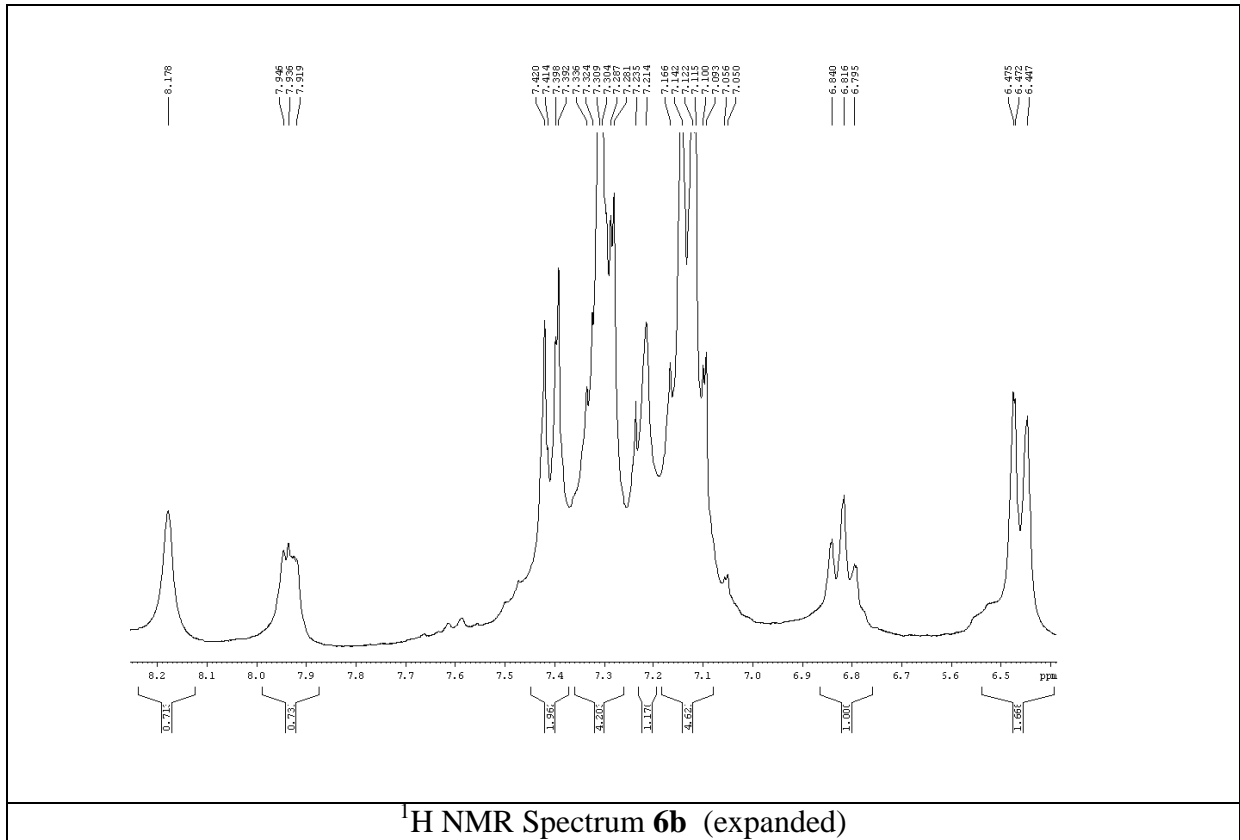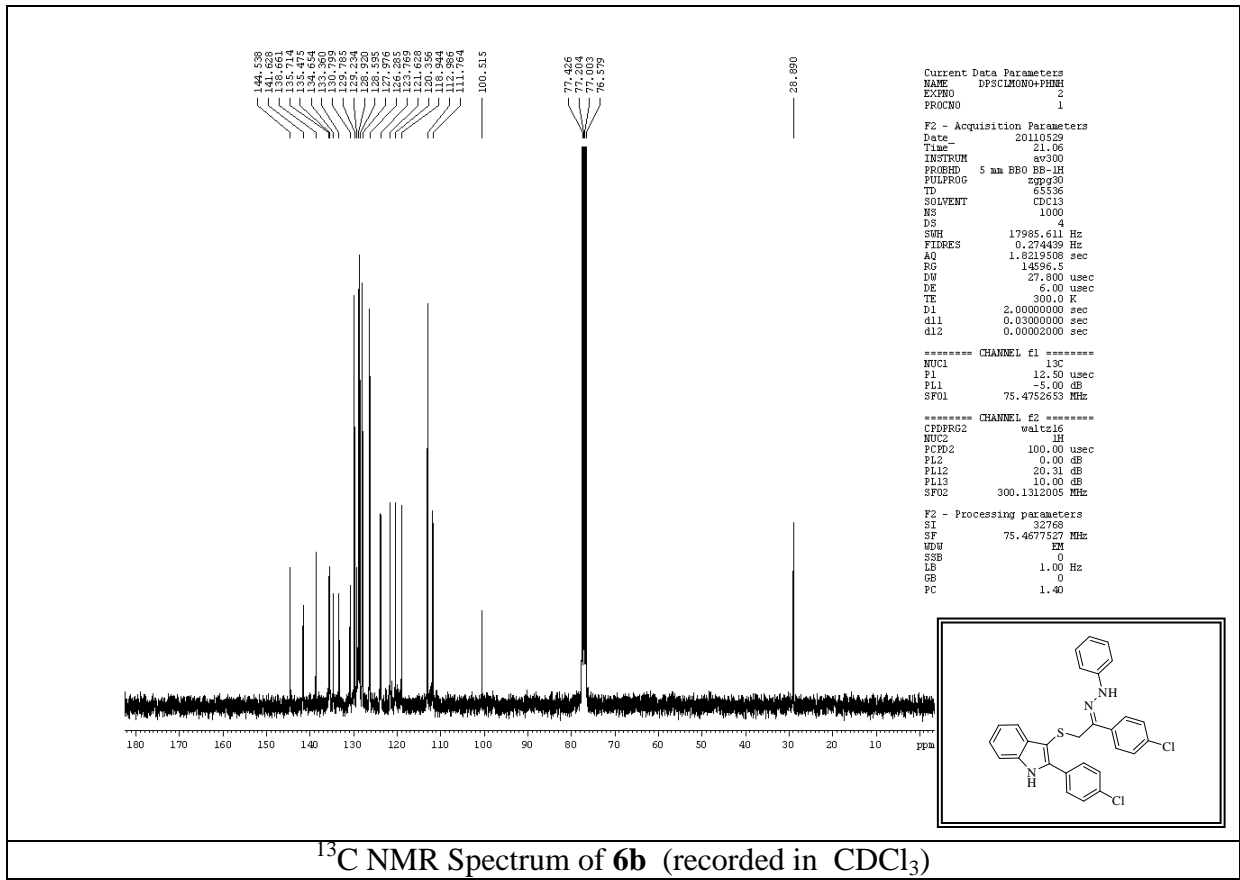

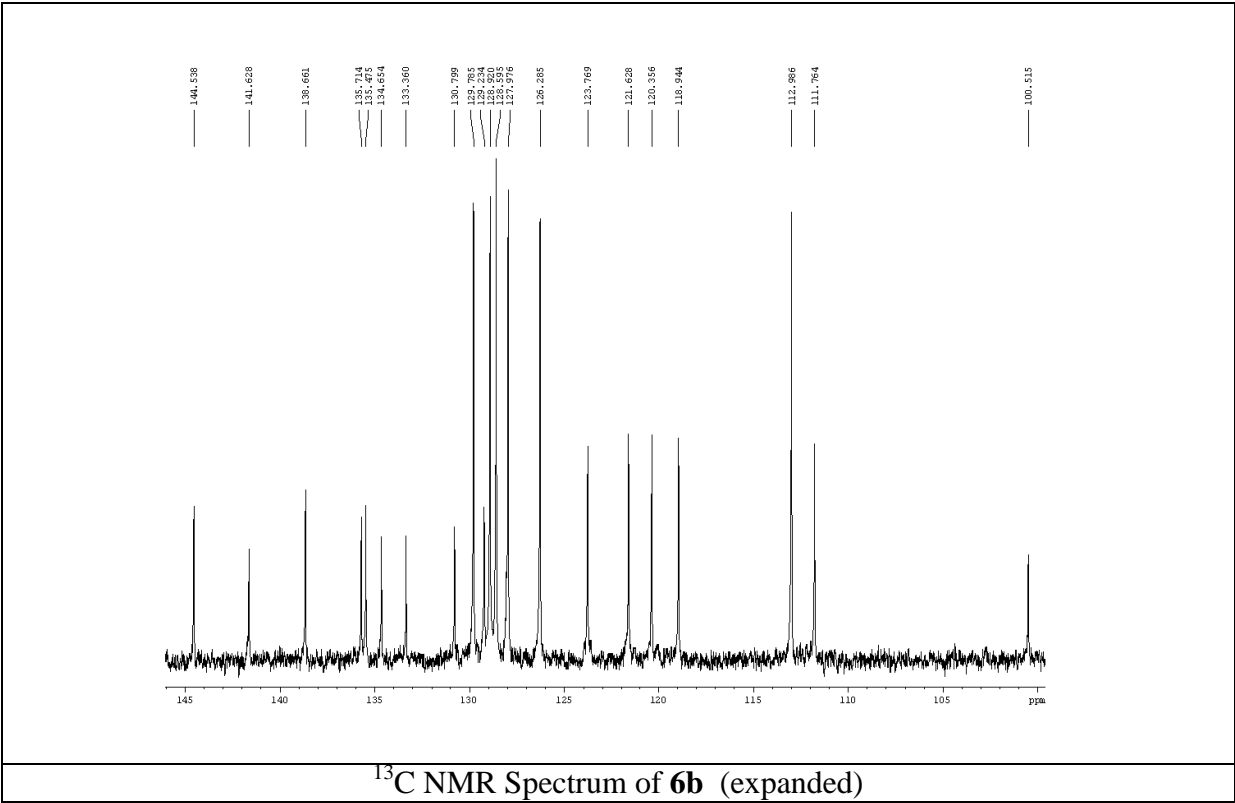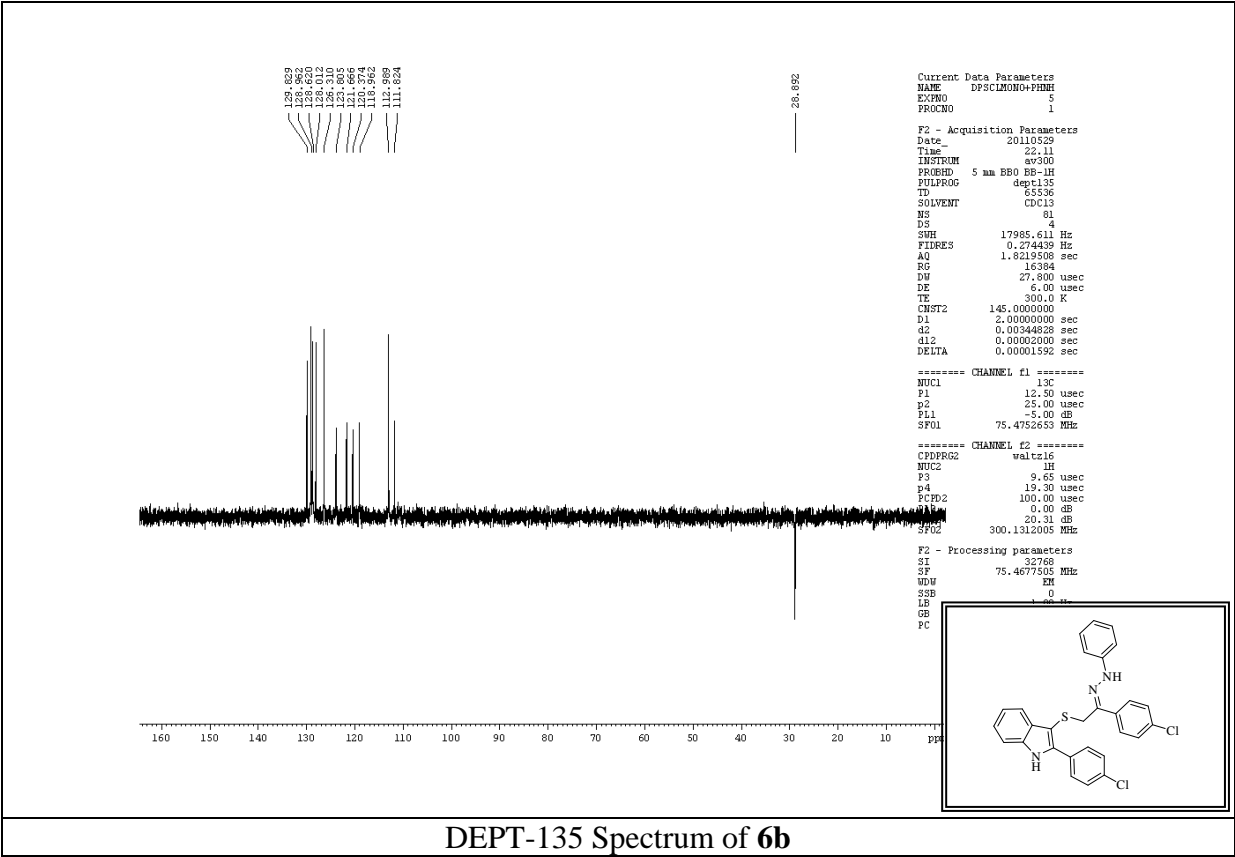

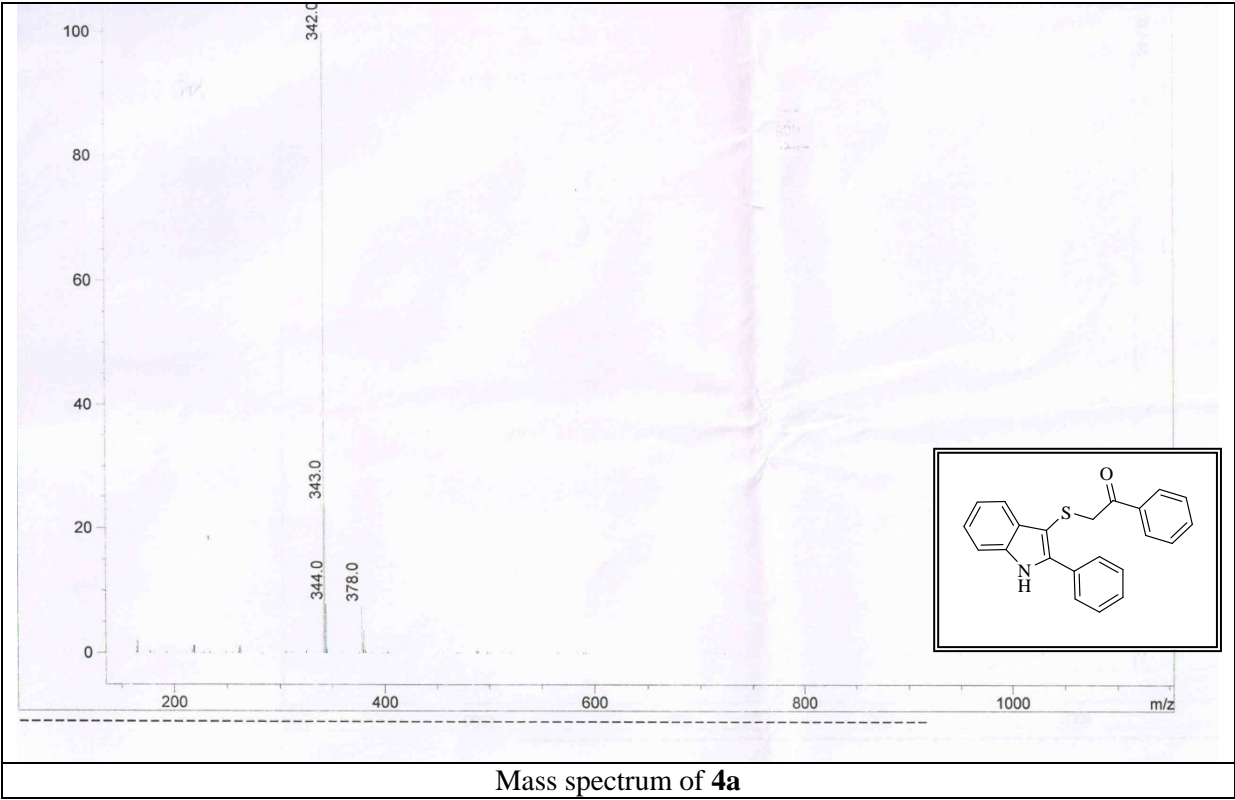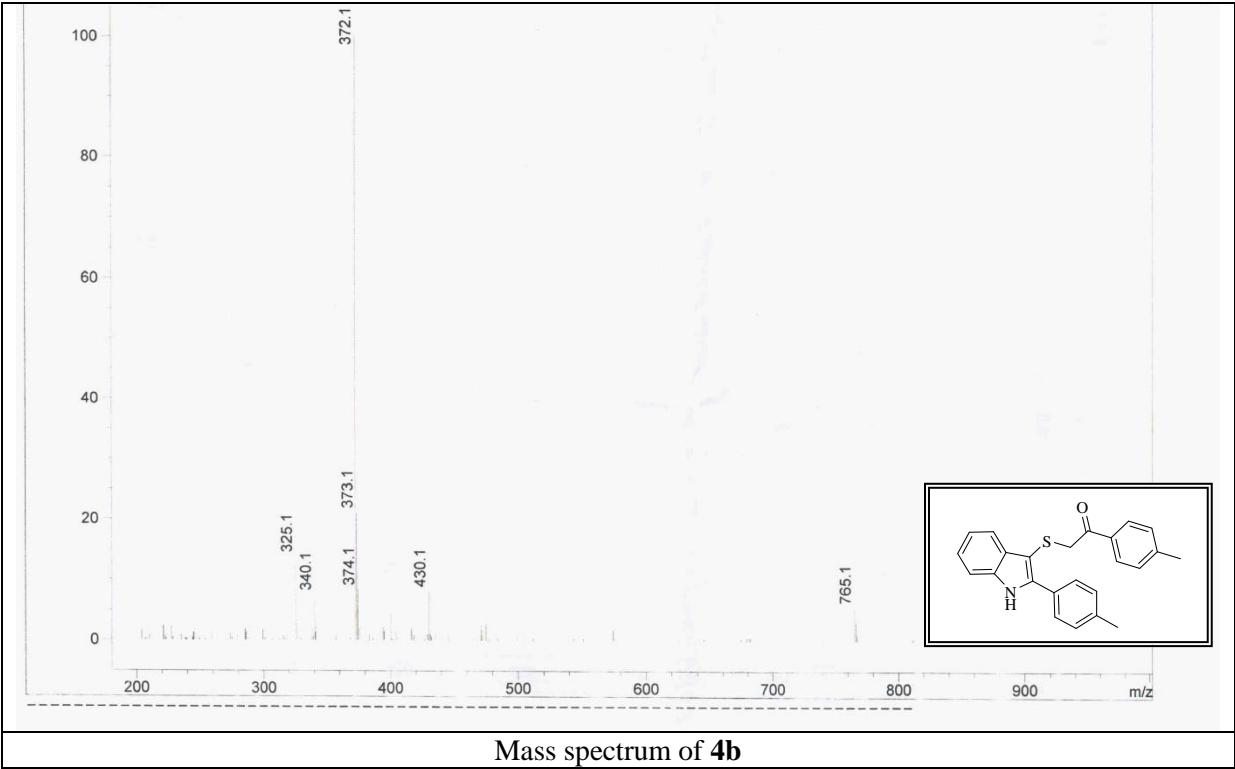

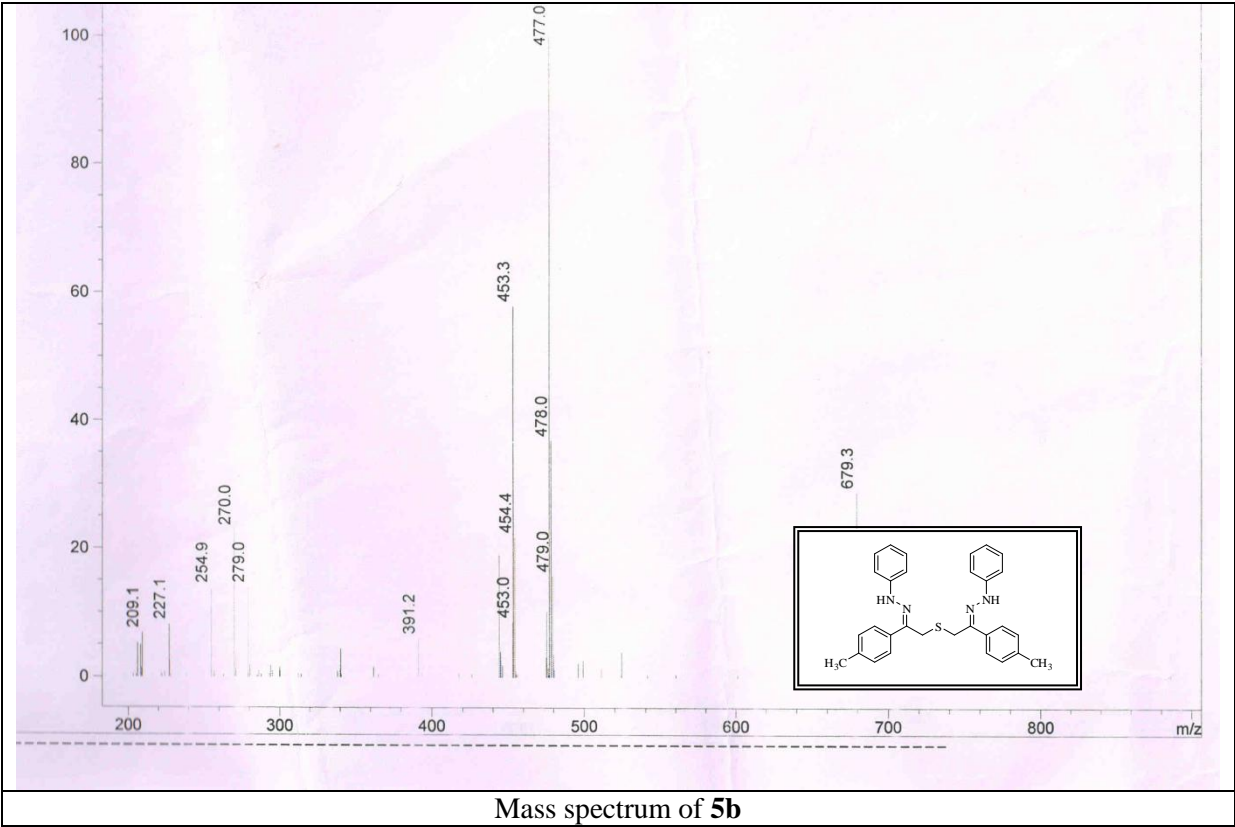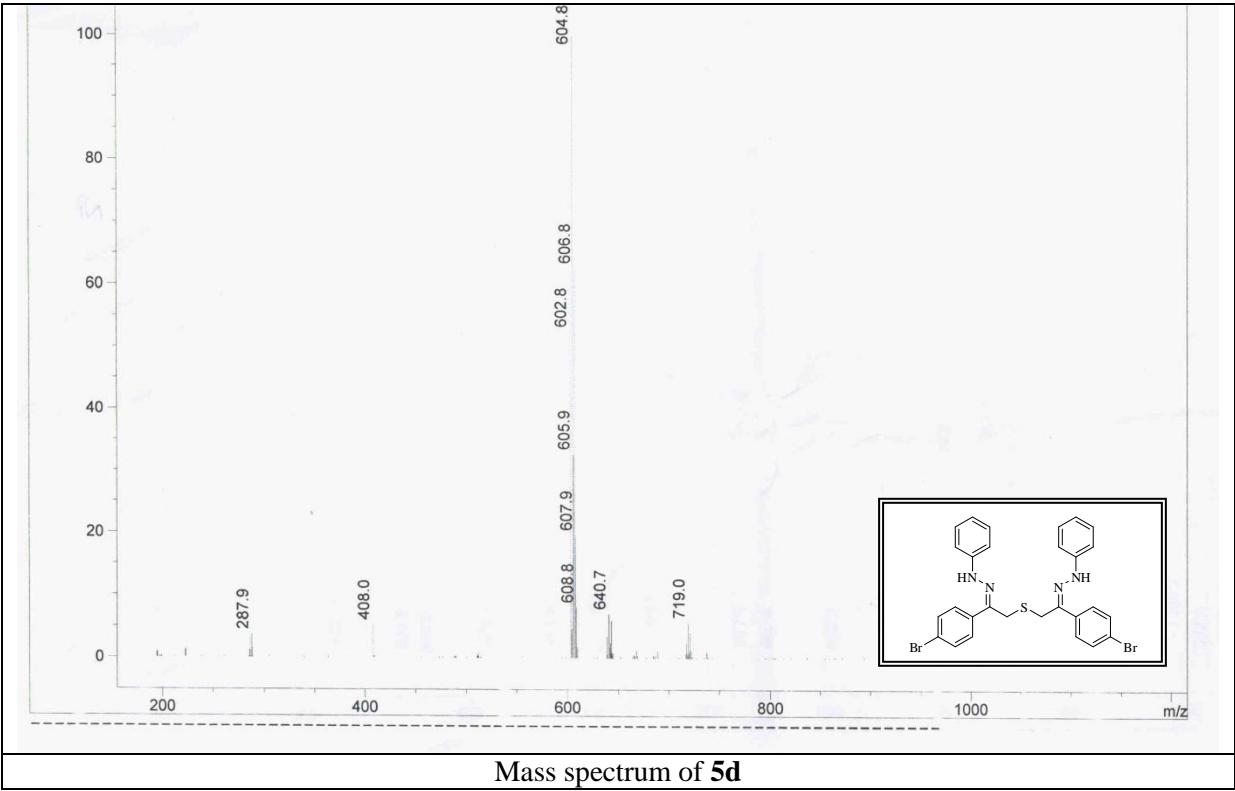

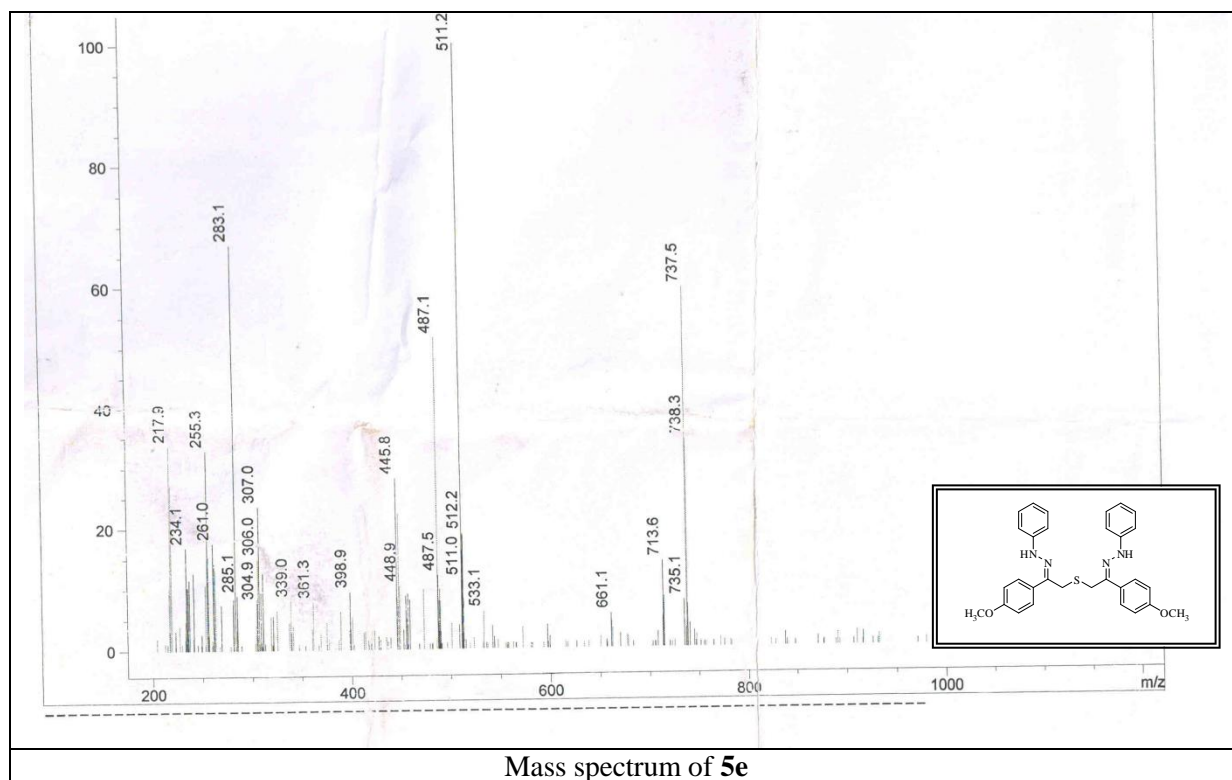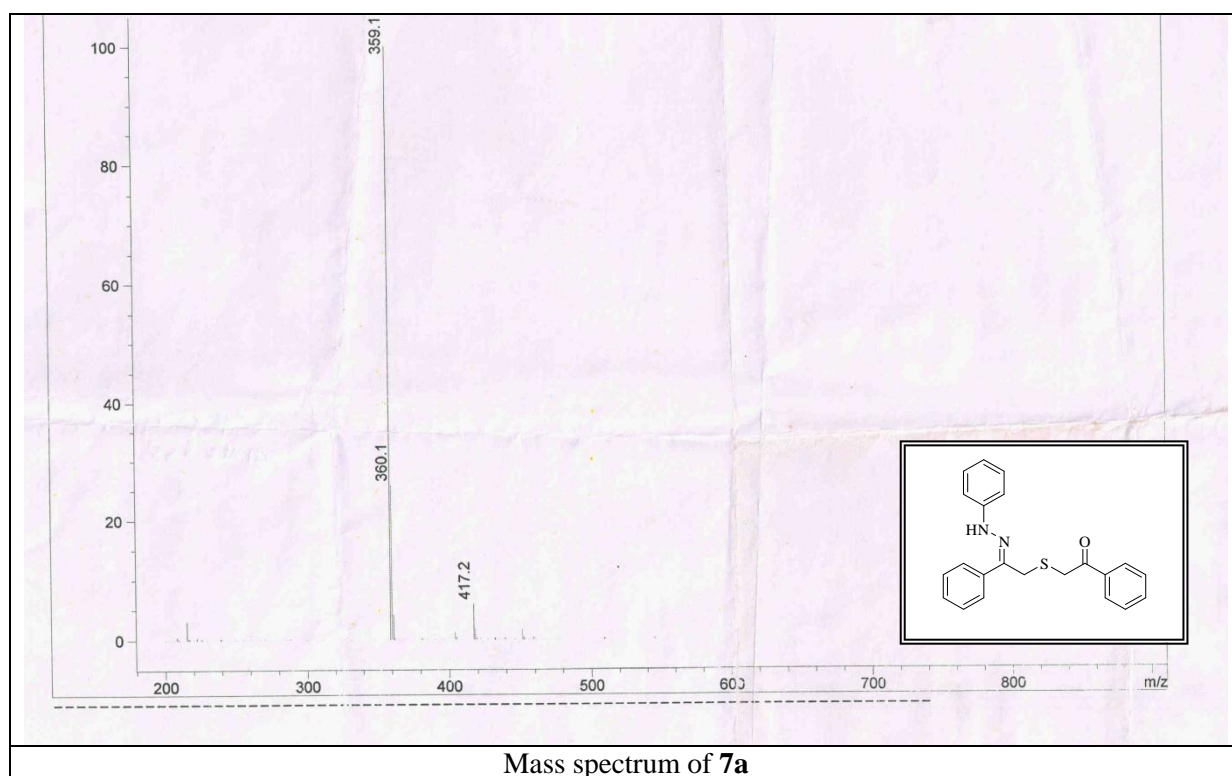

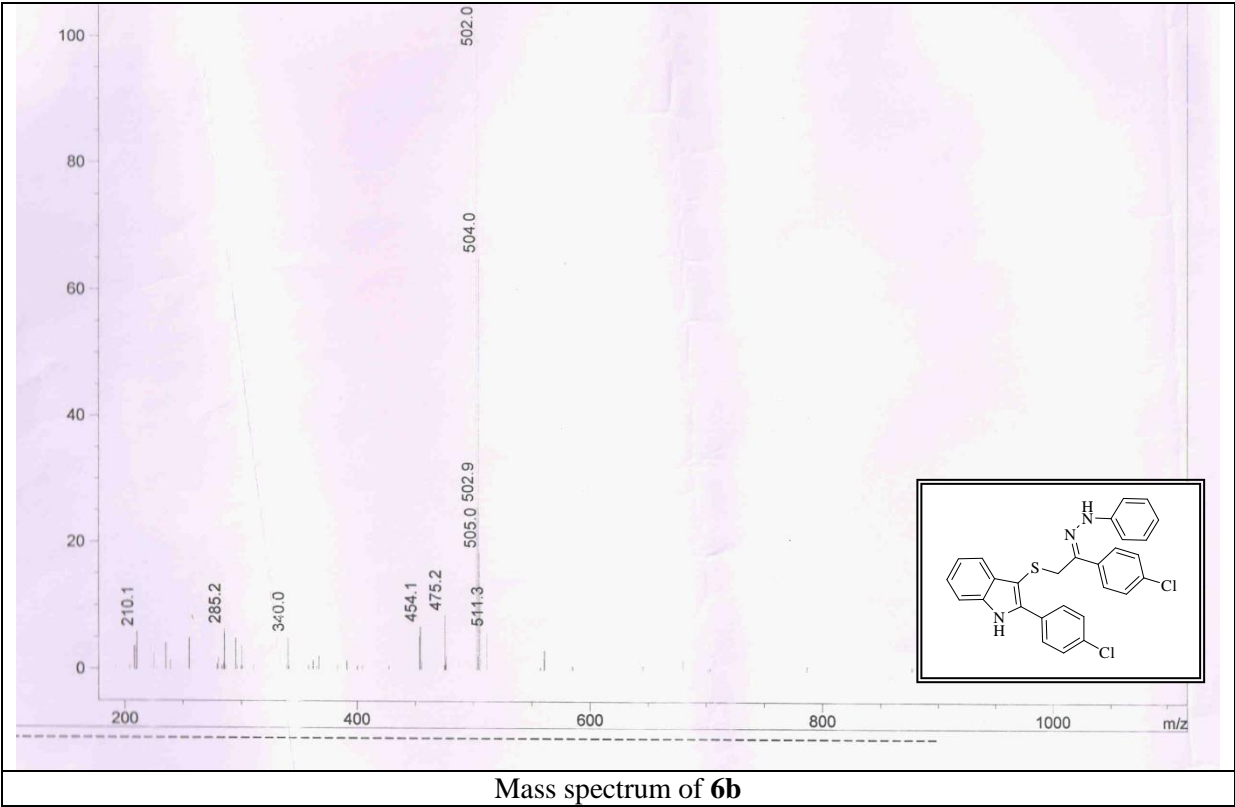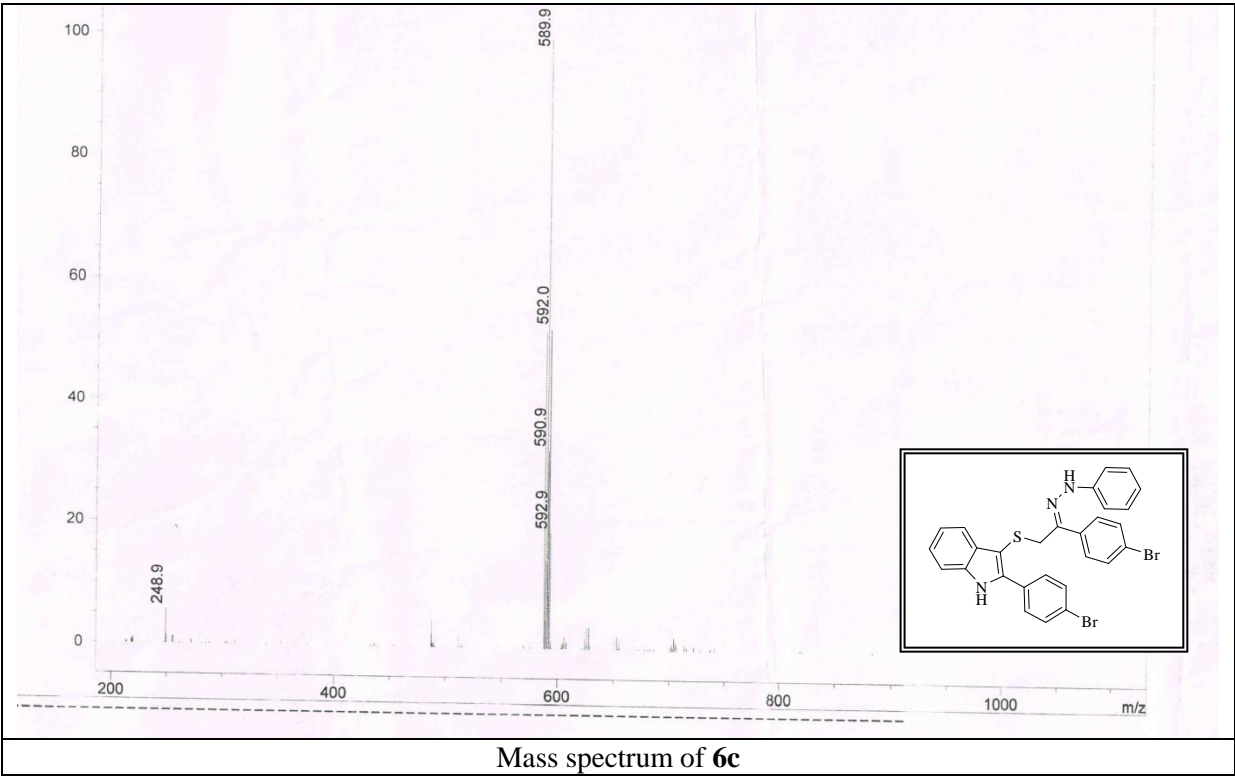

Supplement: c1ra00878a.pdf [file c1ra00878a.pdf]
